# Supplementary material for: Idd9.1 Locus Controls the Suppressive Activity of FoxP3+CD4+CD25+ Regulatory T-Cells
Source: PubMed Central journal article supplement — Diabetes. 2009 Oct 15;59(1):272–81. doi: 10.2337/db09-0648 (PMC2797933; doi:10.2337/db09-0648), 2009-10-15

Online Appendix.

**Supplemental Table 1.**

| Strain                    | Line       | Proximal Out Marker | Proximal in Marker | Distal in Marker | Distal Out Marker | Maximum size of Congenic region |
|---------------------------|------------|---------------------|--------------------|------------------|-------------------|---------------------------------|
| NOD.B10 <i>Idd9.1,2,3</i> | R28 (1104) | D4mit27             | D4mit28            | D4mit42          | D4mit59           | 66.141 Mb                       |
| NOD.B10 <i>Idd9.2,3</i>   | R11 (1105) | D4mit251            | D4nds25            | D4mit42          | D4mit59           | 18.367 Mb                       |
| NOD.B10 <i>Idd9.1</i>     | 1565       | D4mit200            | D4mit258           | D4mit339         | rs27543340        | 18.407 Mb                       |
| NOD.B10 <i>Idd9.2</i>     | 1566       | CD30_Distal-5       | AL606963(TGCA)     | Clstn1-RE        | Pik3cd-RE         | 3.923 Mb                        |
| NOD.B10 <i>Idd9.3</i>     | 1106       | D4mit127            | AL606914(TGCA)     | D4mit42          | D4mit59           | 5.550 Mb                        |

**Novel Markers developed for this study:**

| Marker         | Forward               | Reverse                | Comments        |
|----------------|-----------------------|------------------------|-----------------|
| CD30_Distal-5  | atggagagagtgaggcagga  | ctgttcccaggtagccttga   |                 |
| AL606963(TGCA) | atacccaaagcacccttg    | ggtagactgctccaatgaaagg |                 |
| Clstn1-RE      | gggtagcatcatcaggtcact | gggctccaacaacattctc    | RFLP - Hpych4iv |
| Pik3cd-RE      | acgcgactaatccaacc     | agctgctcctctgtcctgtg   | RFLP - Aci1     |
| AL606914(TGCA) | agcatagcgttcacaggatg  | tatttgcaagagggtcca     |                 |
| rs27543340     | ctgggtctgagaacctgaa   | ttccctgatcactgcttcc    | RFLP - HaeIII   |

**Supplemental Figure 1: List of the published NOD, B6 and B10 SNPs across the *Idd9.1* region, as defined by line 1565.** SNP data for NOD, B6 and B10 strains was downloaded from the Mouse Phenome Project CGD1 strain data set for the *Idd9.1* regions as defined by line 1565 (<http://phenome.jax.org/pub-cgi/phenome/mpdcgi>). Only the SNPs with genotyping data were used, and not the imputed allele data. The SNP list is colored to show if the B6 or NOD SNP allele is the same (pink) or different (green) to the B10 reference strain. If a SNP is contained within a gene, then the gene name is listed – therefore, this is not a complete list of all the genes within the *Idd9.1* region. The distal boundary of strain R201 (Ueno et al, 2008) is shown; the proximal boundary is at 88.7 Mb, 27Mb above the line 1565 proximal boundary.

| loc        | rs         | C57BL/10J | C57BL/6J | NOD/ShiLtJ | SNP location                       |                                                                            |
|------------|------------|-----------|----------|------------|------------------------------------|----------------------------------------------------------------------------|
| 116.061271 | rs27480460 | A         | A        | A          | Mast2:106484:intron:2:2936:38537   | R201 as defined by Ueno, 2008<br>Strain extends up to 88.7 Mb (27 Mb more) |
| 116.101701 | rs32382933 | G         | G        | G          | Mast2:106484:intron:2:1309:38770   |                                                                            |
| 116.144247 | rs6178908  | G         | G        | G          | =                                  |                                                                            |
| 116.144535 | rs6193017  | G         | G        | G          | =                                  |                                                                            |
| 116.232711 | (liftover) | T         | C        | C          | Gpbp111:54876:intron:1:2276:11333  |                                                                            |
| 116.237722 | rs6330601  | G         | G        | G          | Gpbp111:54876:intron:1:7287:11333  |                                                                            |
| 116.237764 | rs27480282 | C         | T        | T          | Gpbp111:54876:intron:1:7330:11333  |                                                                            |
| 116.259251 | rs27480249 | G         | A        | A          | Gpbp111:54876:intron:7:5202:5925   |                                                                            |
| 116.357546 | rs6389568  | C         | C        | C          | =                                  |                                                                            |
| 116.403963 | rs32380318 | T         | C        | T          | Tesk2:68353:intron:2:6649:16906    |                                                                            |
| 116.41404  | rs6215543  | A         | A        | A          | Tesk2:68353:intron:2:16726:16906   |                                                                            |
| 116.414269 | rs6216722  | C         | C        | C          | Tesk2:68353:exon:3:47:302          |                                                                            |
| 116.422244 | rs6249803  | A         | G        | A          | Tesk2:68353:intron:3:7720:9184     |                                                                            |
| 116.439539 | rs27513916 | G         | A        | G          | Tesk2:68353:intron:4:15706:20571   |                                                                            |
| 116.439563 | rs27513914 | G         | A        | G          | Tesk2:68353:intron:4:15730:20571   |                                                                            |
| 116.44483  | rs27513900 | C         | C        | C          | Tesk2:68353:intron:5:375:20237     |                                                                            |
| 116.482027 | rs6380671  | A         | A        | A          | Mutyh:102699:intron:1:1650:6546    |                                                                            |
| 116.499355 | rs27513773 | T         | T        | T          | =                                  |                                                                            |
| 116.507673 | rs32017389 | T         | T        | G          | =                                  |                                                                            |
| 116.511586 | rs27499654 | G         | G        | G          | =                                  |                                                                            |
| 116.548417 | rs31864219 | A         | A        | G          | =                                  |                                                                            |
| 116.552469 | rs6343877  | G         | G        | G          | Zswim5:44823:intron:1:1800:72760   |                                                                            |
| 116.552547 | rs6344034  | T         | T        | T          | Zswim5:44823:intron:1:1878:72760   |                                                                            |
| 116.599648 | rs27499551 | T         | T        | T          | Zswim5:44823:intron:1:48979:72760  |                                                                            |
| 116.602142 | rs27499541 | T         | T        | T          | Zswim5:44823:intron:1:51472:72760  |                                                                            |
| 116.668683 | rs13477932 | A         | A        | A          | Hectd3:50067:exon:2:130:159        |                                                                            |
| 116.752159 | rs32917848 | G         | G        | G          | Eif2b3:106448:intron:10:8765:10769 |                                                                            |
| 116.755375 | rs32213424 | G         | G        | G          | Eif2b3:106448:intron:11:1107:5025  |                                                                            |
| 116.756923 | rs27483579 | A         | A        | A          | Eif2b3:106448:intron:11:2655:5025  |                                                                            |
| 116.780054 | (liftover) | G         | G        | G          | Ptch2:30443:intron:6:1317:1766     |                                                                            |

|            |            |   |   |   |                                            |
|------------|------------|---|---|---|--------------------------------------------|
| 116.789218 | rs27531202 | A | A | A | =                                          |
| 116.789248 | rs33025215 | A | A | A | =                                          |
| 116.813547 | rs32407810 | C | C | C | =                                          |
| 116.813832 | rs32537100 | A | A | A | =                                          |
| 116.837575 | rs27512832 | C | C | C | Kif2c:65896:intron:16:171:2470             |
| 116.838634 | rs27512821 | T | T | T | Kif2c:65896:intron:14:281:747              |
| 116.854233 | rs27512755 | T | T | T | Kif2c:65896:intron:1:801:1762              |
| 116.886588 | rs32118410 | T | T | T | =                                          |
| 116.88914  | rs6378141  | C | C | C | Gm1661:77500:intron:7:11757:12730          |
| 116.889656 | rs27512674 | T | T | T | Gm1661:77500:intron:7:11241:12730          |
| 116.89273  | rs32993216 | T | C | T | Gm1661:77500:intron:7:8168:12730           |
| 116.912026 | rs32631548 | C | T | C | Gm1661:77500:intron:2:782:2338             |
| 116.926469 | rs32924038 | C | C | C | =                                          |
| 116.92659  | rs32059173 | C | C | C | =                                          |
| 116.973268 | rs32207557 | A | A | A | 4931406I20Rik:30439:intron:3:6882:7954     |
| 116.973981 | rs32623996 | G | G | G | 4931406I20Rik:30439:intron:3:6169:7954     |
| 116.975324 | rs6379244  | C | C | C | 4931406I20Rik:30439:intron:3:4826:7954     |
| 116.992888 | rs27498063 | T | T | T | 4931406I20Rik:30439:intron:2:169305:181908 |
| 116.993054 | rs27498062 | C | C | C | 4931406I20Rik:30439:intron:2:169139:181908 |
| 117.005681 | rs27498017 | C | C | C | 4931406I20Rik:30439:intron:2:156512:181908 |
| 117.079803 | rs27482013 | T | T | T | 4931406I20Rik:30439:intron:2:82390:181908  |
| 117.083415 | rs3696331  | A | A | A | 4931406I20Rik:30439:intron:2:78778:181908  |
| 117.118941 | rs27513105 | T | T | T | 4931406I20Rik:30439:intron:2:43252:181908  |
| 117.123492 | rs27513078 | C | C | C | 4931406I20Rik:30439:intron:2:38701:181908  |
| 117.13865  | rs32454974 | G | T | G | 4931406I20Rik:30439:intron:2:23543:181908  |
| 117.147003 | rs33007209 | C | T | C | 4931406I20Rik:30439:intron:2:15190:181908  |
| 117.153274 | rs27512993 | G | G | G | 4931406I20Rik:30439:intron:2:8918:181908   |
| 117.169847 | rs3724818  | G | A | G | =                                          |
| 117.170118 | rs27512967 | A | A | A | =                                          |
| 117.179121 | rs32409639 | C | C | C | =                                          |
| 117.191469 | rs27512916 | C | C | C | =                                          |
| 117.19988  | rs6160489  | T | T | T | =                                          |
| 117.245092 | rs6172225  | G | G | G | Prnpip1:37127:intron:3:7588:17700          |
| 117.245337 | rs6173859  | C | A | C | Prnpip1:37127:intron:3:7833:17700          |
| 117.247973 | rs32012509 | A | G | A | Prnpip1:37127:intron:3:10468:17700         |
| 117.248301 | rs27497446 | G | A | G | Prnpip1:37127:intron:3:10796:17700         |
| 117.260079 | rs6294361  | A | A | A | Prnpip1:37127:intron:4:4756:6379           |
| 117.262832 | rs27497375 | G | G | G | Prnpip1:37127:intron:5:1068:3911           |
| 117.26837  | rs27497356 | G | G | G | Prnpip1:37127:intron:6:2601:22004          |
| 117.271416 | rs32445968 | G | G | G | Prnpip1:37127:intron:6:5647:22004          |
| 117.273287 | rs27497337 | A | A | A | Prnpip1:37127:intron:6:7518:22004          |

|            |            |   |   |   |
|------------|------------|---|---|---|
| 117.276035 | rs32016346 | G | G | G |
| 117.330774 | rs32692203 | G | A | G |
| 117.351685 | rs13477935 | G | G | G |
| 117.455453 | rs33002652 | C | T | C |
| 117.582101 | rs28272806 | C | C | C |
| 117.582168 | rs28272804 | A | A | A |
| 117.628551 | rs28256463 | C | C | C |
| 117.632717 | rs6239826  | A | A | A |
| 117.632742 | rs6239860  | G | G | G |
| 117.632802 | rs6240325  | G | G | G |
| 117.656707 | rs31968689 | G | G | G |
| 117.664998 | rs3657829  | A | A | A |
| 117.683324 | rs31950966 | G | G | G |
| 117.713788 | rs32916077 | A | A | A |
| 117.713807 | rs32171739 | A | A | A |
| 117.731712 | rs27509954 | G | G | G |
| 117.737422 | rs31911534 | G | G | G |
| 117.737531 | rs27509907 | C | C | C |
| 117.741823 | rs3672234  | A | A | A |
| 117.796008 | rs27494049 | A | A | A |
| 117.823083 | rs27494009 | C | C | C |
| 117.843313 | rs32117298 | G | G | G |
| 117.846891 | rs32988917 | A | A | A |
| 117.866514 | rs33003885 | C | C | C |
| 117.866535 | rs32522148 | C | C | C |
| 117.895406 | rs27476717 | A | G | A |
| 117.913702 | rs32287480 | C | C | C |
| 117.929757 | rs6177771  | T | T | T |
| 117.929994 | rs32219851 | G | G | G |
| 117.94106  | rs32430335 | C | C | C |
| 117.942129 | rs13477938 | A | A | A |
| 117.955227 | rs6406931  | G | G | G |
| 117.955277 | rs6309375  | G | G | G |
| 117.970005 | rs27509819 | G | A | G |
| 117.970049 | rs32461048 | C | T | C |
| 117.987422 | rs27509785 | C | T | C |
| 117.992912 | rs27509762 | C | T | C |
| 118.001479 | rs27509741 | C | T | C |
| 118.045081 | rs27495716 | A | G | A |
| 118.053776 | rs27495626 | C | A | C |
| 118.053831 | rs27495625 | G | A | G |

Prnpip1:37127:intron:6:10266:22004  
Prnpip1:37127:intron:8:8762:24333  
Dmap1:102687:intron:4:1762:4074  
=  
lpo13:36156:intron:2:2276:6188  
lpo13:36156:intron:2:2209:6188  
St3gal3:106414:intron:10:1487:16932  
St3gal3:106414:intron:6:4216:4267  
St3gal3:106414:intron:6:4192:4267  
St3gal3:106414:intron:6:4132:4267  
St3gal3:106414:intron:5:30601:50279  
St3gal3:106414:intron:5:22310:50279  
St3gal3:106414:intron:5:3985:50279  
St3gal3:106414:intron:3:13466:22766  
St3gal3:106414:intron:3:13447:22766  
St3gal3:106414:intron:2:48440:52850  
St3gal3:106414:intron:2:42730:52850  
St3gal3:106414:intron:2:42621:52850  
St3gal3:106414:intron:2:38329:52850  
St3gal3:106414:intron:1:10985:26694  
Jmjd2a:97911:intron:12:2711:4322  
Jmjd2a:97911:intron:3:4844:5516  
Jmjd2a:97911:intron:3:1266:5516  
=  
=  
Ptpf:49074:intron:20:424:2616  
Ptpf:49074:intron:7:7800:10888  
Ptpf:49074:intron:6:336:8477  
Ptpf:49074:intron:6:98:8477  
Ptpf:49074:intron:5:720:11497  
Ptpf:49074:exon:4:100:144  
Ptpf:49074:intron:2:2149:7286  
Ptpf:49074:intron:2:2099:7286  
=  
=  
=  
=  
=  
BC059842:75406:intron:59:39:106  
BC059842:75406:intron:41:182:1056  
BC059842:75406:intron:41:127:1056

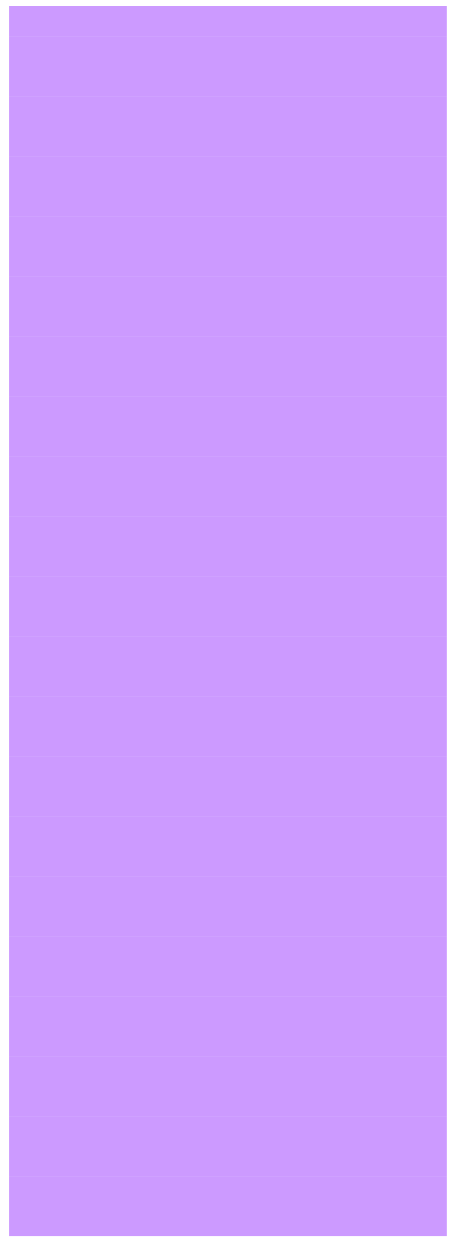

|            |            |   |   |   |
|------------|------------|---|---|---|
| 118.068625 | rs4139507  | G | T | G |
| 118.069134 | rs27495572 | C | T | C |
| 118.079311 | rs32546436 | C | T | C |
| 118.097128 | rs31795463 | C | G | C |
| 118.098322 | rs32895200 | A | G | A |
| 118.098896 | rs32916814 | C | T | C |
| 118.103405 | rs13473974 | A | G | A |
| 118.116039 | rs13477939 | G | G | G |
| 118.116529 | rs27478965 | A | G | A |
| 118.116969 | rs27478961 | C | C | C |
| 118.153545 | rs27478832 | C | C | C |
| 118.15539  | rs6405612  | G | G | G |
| 118.155635 | rs6407195  | C | C | C |
| 118.156089 | rs27478806 | C | T | C |
| 118.185762 | rs32772394 | G | G | G |
| 118.191788 | rs31952445 | C | C | C |
| 118.191849 | rs32739978 | T | T | T |
| 118.199266 | rs27527898 | T | C | T |
| 118.200907 | rs27527883 | G | T | G |
| 118.230239 | rs27510982 | T | C | T |
| 118.232107 | rs27510971 | A | A | A |
| 118.23358  | rs27510965 | T | A | T |
| 118.246826 | rs32547066 | T | C | T |
| 118.249352 | rs6166868  | T | C | T |
| 118.249407 | rs6166977  | G | A | G |
| 118.251554 | (liftover) | C | C | C |
| 118.280499 | rs31832055 | C | C | C |
| 118.284442 | rs31889787 | C | T | C |
| 118.284608 | rs32637959 | G | A | G |
| 118.305214 | rs27495057 | C | C | C |
| 118.307501 | rs6271604  | T | T | T |
| 118.336406 | rs6211147  | A | A | A |
| 118.336532 | rs6212065  | C | C | C |
| 118.373471 | rs31782320 | G | A | G |
| 118.377103 | rs27478204 | T | T | T |
| 118.377425 | rs27478197 | C | T | C |
| 118.38297  | rs3719544  | G | A | G |
| 118.392192 | rs32860353 | C | C | C |
| 118.402628 | rs27527579 | C | C | C |
| 118.413742 | rs3701948  | T | T | T |
| 118.4139   | rs3702580  | T | T | T |

BC059842:75406:intron:7:1592:3581  
 BC059842:75406:intron:7:1083:3581  
 BC059842:75406:intron:1:2455:3609  
 =  
 =  
 =  
 Elov11:6557:exon:3:84:189  
 Mpl:6556:exonUTR:12:246:1264  
 Mpl:6556:intron:11:92:334  
 Mpl:6556:intron:10:1686:1945  
 Tie1:47421:intron:9:1314:1684  
 Tie1:47421:exon:8:7:145  
 Tie1:47421:intron:7:715:952  
 Tie1:47421:intron:7:261:952  
 =  
 =  
 =  
 =  
 2610528J11Rik:30261:intron:1:964:1860  
 1110020C03Rik:71972:intron:22:4159:6883  
 1110020C03Rik:71972:intron:22:2292:6883  
 1110020C03Rik:71972:intron:22:818:6883  
 1110020C03Rik:71972:intron:18:2352:4810  
 1110020C03Rik:71972:intron:17:2588:2617  
 1110020C03Rik:71972:intron:17:2532:2617  
 1110020C03Rik:71972:intron:17:385:2617  
 1110020C03Rik:71972:intron:5:2677:3883  
 1110020C03Rik:71972:intron:4:1086:2142  
 1110020C03Rik:71972:intron:4:920:2142  
 =  
 =  
 =  
 =  
 =  
 =  
 =  
 =  
 =  
 =  
 =  
 =  
 =  
 =  
 =  
 =

|            |            |   |   |   |                                             |
|------------|------------|---|---|---|---------------------------------------------|
| 118.425231 | rs27509428 | C | C | C | =                                           |
| 118.453081 | rs27509358 | T | A | T | =                                           |
| 118.453345 | rs27509354 | T | A | T | =                                           |
| 118.503791 | rs27494641 | C | A | C | Olfr1333:106361:intron:1:4866:5618          |
| 118.605786 | rs32816901 | G | G | G | =                                           |
| 118.60585  | rs27528210 | T | T | T | =                                           |
| 118.641059 | rs13477941 | C | C | C | Lao1:25838:exonUTR:12:673:1106              |
| 118.641791 | rs27510590 | A | A | A | =                                           |
| 118.646792 | rs27510564 | G | G | G | =                                           |
| 118.647022 | rs32635075 | A | A | A | =                                           |
| 118.650034 | rs32699358 | T | T | T | =                                           |
| 118.653649 | rs31839338 | G | G | G | =                                           |
| 118.684494 | rs32054914 | C | C | C | =                                           |
| 118.68696  | rs3661670  | G | G | G | =                                           |
| 118.691525 | rs27496312 | C | C | C | =                                           |
| 118.691838 | rs27496308 | G | G | G | =                                           |
| 118.701238 | rs33032918 | A | A | A | =                                           |
| 118.740058 | rs27479245 | G | G | G | OTTMUSG0000008833:84312:intron:1:1508:12649 |
| 118.742477 | rs32967840 | C | C | C | =                                           |
| 118.74256  | rs6154327  | T | T | T | =                                           |
| 118.743578 | rs27479235 | C | C | C | =                                           |
| 118.753415 | rs32807187 | G | G | G | =                                           |
| 118.753447 | rs32489955 | G | G | G | =                                           |
| 118.768205 | rs27479157 | A | A | A | =                                           |
| 118.772075 | rs33026184 | T | T | T | =                                           |
| 118.775815 | rs32072669 | C | C | C | =                                           |
| 118.777918 | rs32533831 | G | G | G | =                                           |
| 118.77972  | rs32870345 | G | G | G | =                                           |
| 118.786034 | rs27479113 | T | T | T | Slc2a1:30398:intron:1:4455:11416            |
| 118.786059 | rs32638978 | A | A | A | Slc2a1:30398:intron:1:4480:11416            |
| 118.795575 | rs32902414 | G | G | G | Slc2a1:30398:intron:2:2483:11634            |
| 118.808868 | rs27479051 | C | C | C | Slc2a1:30398:exonUTR:10:17:1081             |
| 118.853712 | rs6365760  | G | A | G | Ermap:30396:intron:9:258:1143               |
| 118.854837 | rs27526142 | G | G | G | Ermap:30396:intron:8:610:1454               |
| 118.858571 | rs27526117 | C | A | C | Ermap:30396:intron:4:1129:1272              |
| 118.870438 | rs32624757 | G | G | G | Ccdc23:106345:intron:2:1811:2736            |
| 118.878775 | rs32883145 | A | A | A | 4930538K18Rik:30394:intron:6:3045:3420      |
| 119.061002 | rs27475748 | T | T | T | 1700041C02Rik:63642:intron:5:5143:33803     |
| 119.090912 | rs27521341 | G | G | G | =                                           |
| 119.098105 | rs31950888 | T | T | T | Zmynd12:94819:intron:1:2504:10952           |
| 119.125725 | rs32582454 | C | C | C | Zmynd12:94819:intron:7:2719:3169            |

|            |            |   |   |   |                                     |
|------------|------------|---|---|---|-------------------------------------|
| 119.132781 | rs31750346 | G | G | G | =                                   |
| 119.133493 | rs32937142 | C | C | C | =                                   |
| 119.138138 | rs27505954 | G | G | G | BC057371:49994:exonUTR:5:2991:3236  |
| 119.138435 | rs33001150 | T | T | T | BC057371:49994:exonUTR:5:2695:3236  |
| 119.145461 | rs27505926 | C | C | C | BC057371:49994:intron:3:1661:3846   |
| 119.150852 | rs27505911 | T | T | T | BC057371:49994:intron:1:14049:14274 |
| 119.169968 | rs27505889 | T | T | T | =                                   |
| 119.172764 | rs31853681 | C | C | C | =                                   |
| 119.176268 | rs27505861 | A | A | A | =                                   |
| 119.189081 | rs31772521 | C | C | C | =                                   |
| 119.247096 | rs32413709 | G | G | G | Foxj3:44564:intron:3:689:11947      |
| 119.247179 | rs32734730 | C | C | C | Foxj3:44564:intron:3:772:11947      |
| 119.255532 | rs27505684 | T | T | T | Foxj3:44564:intron:3:9125:11947     |
| 119.255559 | rs32480646 | G | G | G | Foxj3:44564:intron:3:9152:11947     |
| 119.281234 | rs32637963 | G | G | G | Foxj3:44564:intron:5:6135:7496      |
| 119.281797 | rs32954116 | A | A | A | Foxj3:44564:intron:5:6698:7496      |
| 119.282209 | rs32239952 | T | T | T | Foxj3:44564:intron:5:7110:7496      |
| 119.286933 | rs33024239 | C | C | C | Foxj3:44564:intron:6:4236:6415      |
| 119.294095 | rs32918253 | T | T | T | Foxj3:44564:intron:9:1141:1251      |
| 119.328765 | rs27490511 | A | A | A | =                                   |
| 119.329273 | rs4224736  | G | G | G | Guca2b:44426:exonUTR:3:181:226      |
| 119.329979 | rs27490504 | G | G | G | Guca2b:44426:intron:2:154:676       |
| 119.334686 | rs33891565 | T | T | T | =                                   |
| 119.353352 | rs28334593 | A | A | A | =                                   |
| 119.358143 | rs28334554 | C | C | C | =                                   |
| 119.389297 | rs28252761 | C | C | C | =                                   |
| 119.394012 | rs3688968  | A | A | A | =                                   |
| 119.39421  | rs28252715 | T | T | T | =                                   |
| 119.397219 | rs3676847  | C | C | C | =                                   |
| 119.409645 | rs32977054 | G | G | G | =                                   |
| 119.416842 | rs32512018 | T | T | T | =                                   |
| 119.416868 | rs32418173 | A | A | A | =                                   |
| 119.439981 | rs3676600  | G | G | A | =                                   |
| 119.443211 | rs13477943 | A | A | G | =                                   |
| 119.443872 | rs6329127  | A | A | A | =                                   |
| 119.476429 | rs33011513 | C | C | C | =                                   |
| 119.489574 | rs6180597  | T | T | T | Hivep3:30383:intron:1:2177:182381   |
| 119.498763 | rs27515976 | G | G | G | Hivep3:30383:intron:1:11366:182381  |
| 119.514829 | rs3684040  | G | G | G | Hivep3:30383:intron:1:27432:182381  |
| 119.514887 | rs3684575  | G | G | G | Hivep3:30383:intron:1:27490:182381  |
| 119.530937 | rs27515881 | T | T | T | Hivep3:30383:intron:1:43541:182381  |

|            |            |   |   |   |                                     |
|------------|------------|---|---|---|-------------------------------------|
| 119.544652 | rs27502013 | C | C | C | Hivep3:30383:intron:1:57255:182381  |
| 119.544731 | rs27502012 | C | C | T | Hivep3:30383:intron:1:57334:182381  |
| 119.553333 | rs31830486 | G | G | G | Hivep3:30383:intron:1:65936:182381  |
| 119.55801  | rs31820196 | A | A | A | Hivep3:30383:intron:1:70613:182381  |
| 119.558347 | rs27501990 | G | G | A | Hivep3:30383:intron:1:70950:182381  |
| 119.568353 | rs27501964 | T | T | T | Hivep3:30383:intron:1:80956:182381  |
| 119.569334 | rs27501955 | C | C | C | Hivep3:30383:intron:1:81937:182381  |
| 119.569651 | rs27501951 | C | C | A | Hivep3:30383:intron:1:82254:182381  |
| 119.587147 | rs13477944 | G | G | G | Hivep3:30383:intron:1:99750:182381  |
| 119.607754 | rs27501819 | T | T | G | Hivep3:30383:intron:1:120357:182381 |
| 119.608163 | rs27501814 | A | A | T | Hivep3:30383:intron:1:120766:182381 |
| 119.612776 | rs27486166 | C | C | A | Hivep3:30383:intron:1:125379:182381 |
| 119.617348 | rs27486143 | G | G | A | Hivep3:30383:intron:1:129951:182381 |
| 119.620784 | rs32710583 | A | A | G | Hivep3:30383:intron:1:133387:182381 |
| 119.625692 | rs31791774 | G | G | G | Hivep3:30383:intron:1:138295:182381 |
| 119.63371  | rs27486097 | G | G | T | Hivep3:30383:intron:1:146313:182381 |
| 119.642224 | rs27486058 | T | T | T | Hivep3:30383:intron:1:154827:182381 |
| 119.64412  | rs27486054 | C | C | C | Hivep3:30383:intron:1:156723:182381 |
| 119.736221 | rs32823296 | A | A | A | Hivep3:30383:intron:2:66362:67613   |
| 119.737568 | rs32131195 | T | T | T | Hivep3:30383:UTR:3:95:195           |
| 119.737587 | rs32379758 | C | C | C | Hivep3:30383:UTR:3:114:195          |
| 119.751307 | rs6401858  | G | G | G | Hivep3:30383:intron:3:13638:28898   |
| 119.751327 | rs6401898  | A | A | G | Hivep3:30383:intron:3:13657:28898   |
| 119.754588 | rs27517258 | A | A | G | Hivep3:30383:intron:3:16918:28898   |
| 119.769727 | rs6206730  | C | C | C | Hivep3:30383:exon:6:289:2618        |
| 119.887355 | rs27487288 | G | G | A | =                                   |
| 119.887408 | rs27487287 | T | T | C | =                                   |
| 119.897521 | rs27487207 | A | A | C | =                                   |
| 119.901732 | rs3699269  | C | C | C | =                                   |
| 119.930366 | rs32431221 | A | A | A | =                                   |
| 119.930529 | rs32048286 | A | A | C | =                                   |
| 119.93727  | rs32672455 | C | C | T | =                                   |
| 119.952773 | rs6210697  | A | A | A | Foxo6:63846:intron:1:6669:17654     |
| 119.953136 | rs6375399  | A | A | A | Foxo6:63846:intron:1:6306:17654     |
| 119.970739 | rs32080294 | T | T | C | =                                   |
| 119.981421 | rs3712685  | G | G | G | =                                   |
| 119.981621 | rs3713987  | C | C | C | =                                   |
| 120.028961 | rs31896051 | C | C | T | =                                   |
| 120.031639 | rs32670818 | A | A | G | =                                   |
| 120.05999  | rs32263942 | C | C | T | =                                   |
| 120.12846  | rs31834963 | A | A | T | Scmh1:64991:intron:4:2078:8235      |



|            |            |   |   |   |                                   |
|------------|------------|---|---|---|-----------------------------------|
| 120.128636 | rs32318541 | G | G | T | Scmh1:64991:intron:4:2255:8235    |
| 120.142644 | rs28272539 | T | T | C | Scmh1:64991:intron:7:1569:9531    |
| 120.148307 | rs32697977 | G | G | A | Scmh1:64991:intron:7:7232:9531    |
| 120.148325 | rs6249611  | T | T | G | Scmh1:64991:intron:7:7250:9531    |
| 120.158729 | rs6319522  | A | A | G | Scmh1:64991:intron:9:2289:21448   |
| 120.198057 | rs28256802 | A | A | G | Scmh1:64991:intron:15:387:3090    |
| 120.198096 | rs31866291 | C | C | T | Scmh1:64991:intron:15:426:3090    |
| 120.233523 | rs28256652 | T | T | T | Ctps:30381:intron:5:479:2527      |
| 120.246957 | rs28256625 | C | C | C | =                                 |
| 120.247019 | rs28256624 | A | A | A | =                                 |
| 120.249794 | rs32625362 | G | G | G | =                                 |
| 120.25673  | rs32572768 | G | G | G | =                                 |
| 120.25678  | rs28256584 | A | A | G | =                                 |
| 120.291581 | rs6153340  | C | C | C | =                                 |
| 120.294122 | rs27516443 | C | C | T | =                                 |
| 120.324782 | rs32768013 | G | G | G | =                                 |
| 120.332559 | rs27516360 | C | C | C | =                                 |
| 120.342858 | rs32632298 | G | G | A | =                                 |
| 120.345488 | rs32292070 | C | C | G | =                                 |
| 120.384482 | rs27516187 | G | G | A | Kcnq4:30376:intron:8:1133:1625    |
| 120.390675 | rs27499949 | C | C | C | Kcnq4:30376:intron:1:28788:29309  |
| 120.400008 | rs6372607  | G | G | G | Kcnq4:30376:intron:1:19455:29309  |
| 120.43416  | rs27499799 | T | T | T | Nfyc:43429:intron:8:71:2234       |
| 120.476824 | rs3708694  | A | A | G | Nfyc:43429:intron:1:21310:35039   |
| 120.479153 | rs27499696 | T | T | C | Nfyc:43429:intron:1:18981:35039   |
| 120.48701  | rs27499683 | G | G | G | Nfyc:43429:intron:1:11124:35039   |
| 120.495767 | rs27485863 | A | A | C | Nfyc:43429:intron:1:2367:35039    |
| 120.501524 | rs32783948 | G | G | A | =                                 |
| 120.558713 | rs31845867 | T | T | G | Rims3:71093:intron:4:2891:3716    |
| 120.559222 | rs32380821 | T | T | C | Rims3:71093:intron:4:3399:3716    |
| 120.559821 | rs27485679 | G | G | A | Rims3:71093:intron:5:172:1943     |
| 120.564307 | rs32220959 | C | C | T | Rims3:71093:exonUTR:8:406:506     |
| 120.569719 | rs32993097 | T | T | A | =                                 |
| 120.590787 | rs32601116 | G | G | A | =                                 |
| 120.603306 | rs32505326 | T | T | C | Zfp69:60000:exonUTR:6:804:1368    |
| 120.646569 | rs32038056 | G | G | G | Smap1l:43200:intron:7:420:1126    |
| 120.668573 | rs32638068 | A | A | A | Smap1l:43200:intron:1:20779:31418 |
| 120.691835 | rs13477947 | T | T | C | =                                 |
| 120.691998 | rs32736006 | G | G | A | =                                 |
| 120.692038 | rs32747863 | A | A | T | =                                 |
| 120.726781 | rs6337795  | A | T | A | Col9a2:30372:intron:30:217:293    |

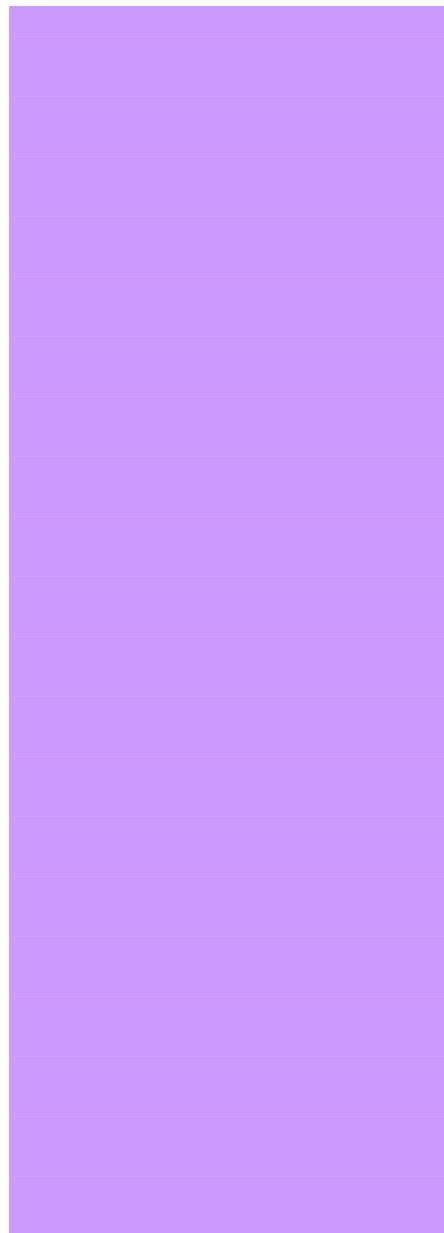

|            |            |   |   |   |
|------------|------------|---|---|---|
| 120.72698  | rs6338910  | A | A | A |
| 120.731449 | rs3675629  | A | C | A |
| 120.785977 | rs31831126 | C | T | C |
| 120.825717 | rs6165780  | C | C | C |
| 120.826347 | rs6169181  | G | G | G |
| 120.875375 | rs13477948 | G | G | G |
| 120.911498 | rs27484327 | A | C | A |
| 120.912467 | rs32311574 | C | T | C |
| 120.956746 | rs33031811 | T | C | T |
| 121.036609 | rs27484207 | C | T | C |
| 121.069749 | rs27484134 | T | A | T |
| 121.181905 | rs31878303 | G | A | G |
| 122.296306 | rs28273796 | A | A | C |
| 122.326261 | rs28273777 | T | T | A |
| 122.39734  | rs28273736 | A | A | G |
| 122.397886 | rs28273733 | A | A | G |
| 122.400133 | rs28273720 | T | T | G |
| 122.403764 | rs32858367 | C | C | T |
| 122.489244 | rs3702881  | A | A | G |
| 122.519569 | rs32332434 | G | G | G |
| 122.52333  | rs28258257 | C | T | C |
| 122.527913 | rs28258229 | C | T | C |
| 122.536809 | rs28258182 | C | T | C |
| 122.543559 | rs28258159 | A | G | A |
| 122.563936 | rs28258105 | C | A | C |
| 122.589106 | rs6377447  | T | T | T |
| 122.633615 | rs6220300  | C | T | C |
| 122.649743 | rs6286451  | T | T | T |
| 122.65011  | rs6301491  | A | A | A |
| 122.651149 | rs27567064 | G | G | G |
| 122.680701 | rs6271907  | A | A | A |
| 122.683186 | rs27567036 | C | G | C |
| 122.811425 | rs27552059 | A | A | A |
| 122.848211 | rs32558312 | A | G | G |
| 122.862471 | rs27551881 | C | G | G |
| 122.86306  | rs27551879 | A | G | G |
| 122.893996 | rs6375670  | C | T | T |
| 122.894046 | rs6375748  | G | G | G |
| 122.903847 | rs27532819 | C | T | T |
| 122.943401 | rs27532761 | G | A | G |
| 122.980182 | rs27585557 | G | G | G |

|                                 |  |
|---------------------------------|--|
| Col9a2:30372:intron:31:44:264   |  |
| =                               |  |
| =                               |  |
| Rlf:56635:intron:7:1743:3832    |  |
| Rlf:56635:intron:7:1113:3832    |  |
| Rlf:56635:intron:1:12064:24575  |  |
| =                               |  |
| =                               |  |
| =                               |  |
| =                               |  |
| =                               |  |
| =                               |  |
| =                               |  |
| =                               |  |
| =                               |  |
| Ppt1:97901:intron:5:44:2389     |  |
| Ppt1:97901:intron:6:2134:5054   |  |
| Cap1:69533:exonUTR:13:650:1169  |  |
| Cap1:69533:intron:6:1168:2208   |  |
| =                               |  |
| =                               |  |
| Mfsd2:30408:intron:3:359:4601   |  |
| =                               |  |
| =                               |  |
| =                               |  |
| =                               |  |
| Ppie:30404:intron:6:872:1696    |  |
| =                               |  |
| Hpcal4:59667:intron:2:1371:4856 |  |
| Hpcal4:59667:intron:2:1959:4856 |  |
| =                               |  |
| =                               |  |
| =                               |  |
| =                               |  |

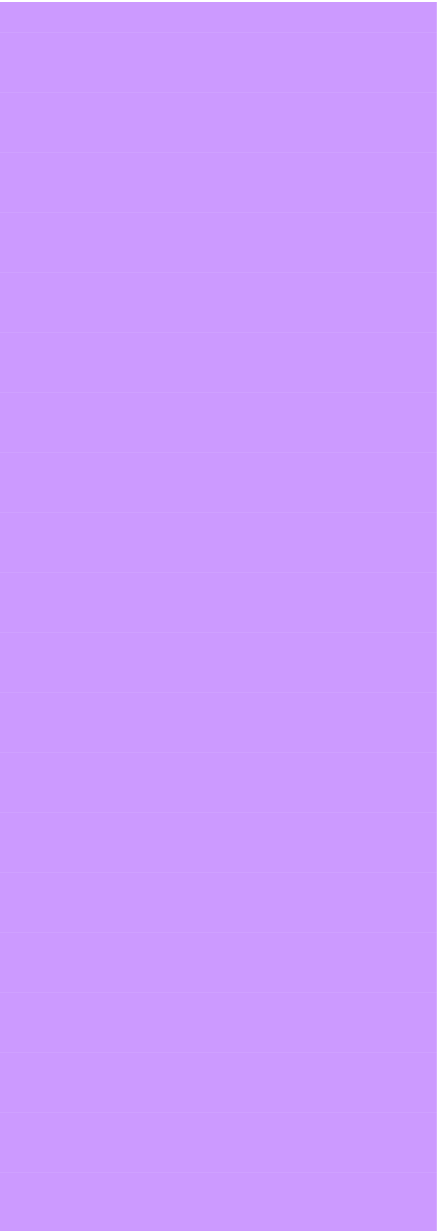

|            |            |   |   |   |                                         |
|------------|------------|---|---|---|-----------------------------------------|
| 123.013561 | rs32980042 | C | C | G | Bmp8a:40496:intron:1:6065:17093         |
| 123.0269   | rs27568952 | T | T | C | =                                       |
| 123.039561 | rs27568894 | C | C | C | Macf1:84301:intron:97:1738:3028         |
| 123.04726  | rs27568874 | C | C | A | Macf1:84301:intron:91:567:615           |
| 123.04775  | rs27568869 | C | C | C | Macf1:84301:intron:91:78:615            |
| 123.061215 | rs27568819 | G | G | A | Macf1:84301:intron:73:672:1220          |
| 123.061701 | rs31955955 | C | C | T | Macf1:84301:intron:73:186:1220          |
| 123.061745 | rs31939471 | G | G | G | Macf1:84301:intron:73:141:1220          |
| 123.115527 | rs27553626 | G | G | C | Macf1:84301:intron:58:181:3269          |
| 123.120412 | rs6159638  | T | T | T | Macf1:84301:intron:54:1664:3168         |
| 123.17867  | rs6277874  | G | G | G | Macf1:84301:intron:20:735:2137          |
| 123.178815 | rs6278429  | C | C | C | Macf1:84301:intron:20:590:2137          |
| 123.179254 | rs13477954 | A | A | T | Macf1:84301:intron:20:152:2137          |
| 123.247392 | rs6215420  | G | G | G | Macf1:84301:intron:1:113819:129602      |
| 123.247413 | rs6215445  | C | C | C | Macf1:84301:intron:1:113798:129602      |
| 123.311252 | rs6200549  | A | A | A | Macf1:84301:intron:1:49959:129602       |
| 123.328903 | rs6299331  | G | G | G | Macf1:84301:intron:1:32309:129602       |
| 123.329237 | rs6301018  | G | G | G | Macf1:84301:intron:1:31974:129602       |
| 123.351432 | rs6196829  | T | T | T | Macf1:84301:intron:1:9779:129602        |
| 123.353724 | rs27568165 | G | G | A | Macf1:84301:intron:1:7488:129602        |
| 123.362284 | rs31922214 | C | C | T | =                                       |
| 123.362734 | rs32419013 | G | G | A | =                                       |
| 123.367331 | rs32785483 | A | A | A | =                                       |
| 123.481039 | rs27552838 | T | T | T | =                                       |
| 123.481094 | rs27552836 | T | T | G | =                                       |
| 123.483516 | rs27552823 | A | A | G | =                                       |
| 123.48816  | rs27552814 | G | G | G | =                                       |
| 123.496718 | rs31781739 | C | C | C | =                                       |
| 123.499983 | rs32440379 | A | A | G | =                                       |
| 123.500111 | rs32451467 | T | T | G | =                                       |
| 123.511044 | rs31820144 | G | G | G | =                                       |
| 123.522811 | rs32198095 | T | T | T | =                                       |
| 123.538006 | rs13477956 | A | A | A | 4933427I04Rik:97896:exonUTR:1:1083:1526 |
| 123.550206 | rs27534074 | C | C | C | =                                       |
| 123.572903 | rs27534001 | T | T | T | ENSMUSG00000073760:97894:exon:1:230:305 |
| 123.572998 | rs27533999 | C | C | C | =                                       |
| 123.623913 | rs3682864  | A | A | A | =                                       |
| 123.742458 | rs27567169 | A | A | A | =                                       |
| 123.742614 | rs3656522  | G | G | A | =                                       |
| 123.749342 | rs6285698  | A | A | A | =                                       |
| 123.843059 | rs6195490  | T | T | C | =                                       |

|            |            |   |   |   |   |
|------------|------------|---|---|---|---|
| 123.843127 | rs6196005  | A | A | T | = |
| 123.851747 | rs27529837 | G | G | T | = |
| 123.851885 | rs27529836 | A | A | G | = |
| 123.857178 | rs32413742 | T | T | G | = |
| 123.863756 | rs6245239  | A | A | G | = |
| 123.873196 | rs13477959 | G | G | A | = |
| 123.885164 | rs3714811  | G | G | A | = |
| 123.887326 | rs32467939 | T | T | C | = |
| 123.899226 | rs3666419  | A | A | G | = |
| 123.92438  | rs6412828  | T | T | G | = |
| 123.931233 | rs27569802 | A | A | A | = |
| 123.9335   | rs32782394 | C | C | T | = |
| 123.96349  | rs3089780  | A | A | T | = |
| 123.983078 | rs3678760  | A | A | T | = |
| 123.98319  | rs3679435  | C | C | T | = |
| 124.007755 | rs31753552 | C | C | T | = |
| 124.009626 | rs32385238 | G | G | G | = |
| 124.015445 | rs27554175 | A | A | G | = |
| 124.026093 | rs32356536 | G | G | A | = |
| 124.038026 | rs6198954  | T | T | C | = |
| 124.084324 | rs27536730 | G | G | A | = |
| 124.109508 | rs32703791 | G | G | G | = |
| 124.127494 | rs27586424 | C | C | C | = |
| 124.13123  | rs3695420  | T | T | T | = |
| 124.131258 | rs3695476  | T | T | T | = |
| 124.140375 | rs32006033 | G | G | G | = |
| 124.151372 | rs27586384 | A | A | A | = |
| 124.164696 | rs27570439 | A | A | A | = |
| 124.166566 | rs27570424 | T | T | T | = |
| 124.184113 | rs6264989  | T | T | T | = |
| 124.188462 | rs27570331 | T | T | T | = |
| 124.191047 | rs27570309 | T | T | T | = |
| 124.196614 | rs27570267 | C | C | C | = |
| 124.286126 | rs27555534 | A | A | C | = |
| 124.307734 | rs27538359 | A | A | G | = |
| 124.311081 | rs6304079  | G | G | C | = |
| 124.311705 | rs32174150 | A | A | T | = |
| 124.312047 | rs27538339 | T | T | C | = |
| 124.312962 | rs27538328 | A | A | C | = |
| 124.364541 | rs3717052  | G | G | A | = |
| 124.370918 | rs27585823 | G | G | G | = |

Utp11l:30738:intron:1:6142:7287

|            |            |   |   |   |                                        |  |
|------------|------------|---|---|---|----------------------------------------|--|
| 124.371021 | rs27585821 | A | A | G | =                                      |  |
| 124.486851 | rs31958723 | A | A | G | Mtf1:106191:intron:3:4490:15088        |  |
| 124.490366 | rs3726196  | C | C | C | Mtf1:106191:intron:3:8006:15088        |  |
| 124.493929 | rs3716174  | A | A | A | Mtf1:106191:intron:3:11569:15088       |  |
| 124.500263 | rs27534726 | C | C | C | Mtf1:106191:intron:5:1658:2925         |  |
| 124.508607 | rs27534675 | C | C | C | Mtf1:106191:intron:8:165:6500          |  |
| 124.515085 | rs33863605 | A | A | A | Mtf1:106191:intron:9:39:516            |  |
| 124.530543 | rs32918420 | T | T | C | Yrdc:30720:intron:3:1279:1853          |  |
| 124.534545 | rs6191300  | A | A | G | Gm50:106186:intron:4:1828:1890         |  |
| 124.59312  | rs6345428  | C | C | C | =                                      |  |
| 124.59319  | rs6345952  | T | T | T | =                                      |  |
| 124.619519 | rs6296380  | C | C | C | 9930104L06Rik:94769:intron:3:1728:1805 |  |
| 124.620161 | rs6312696  | T | T | T | 9930104L06Rik:94769:exonUTR:5:333:2077 |  |
| 124.627203 | rs6327393  | C | C | C | =                                      |  |
| 124.64566  | rs6169623  | T | T | C | =                                      |  |
| 124.645749 | rs6170174  | C | C | C | =                                      |  |
| 124.86632  | rs27581607 | A | A | G | =                                      |  |
| 124.875899 | rs32623165 | G | G | A | =                                      |  |
| 124.87719  | rs27581600 | A | A | C | =                                      |  |
| 124.883823 | rs27565661 | G | G | A | =                                      |  |
| 124.900442 | rs3716393  | A | A | G | =                                      |  |
| 124.904157 | rs32042685 | A | A | C | =                                      |  |
| 124.908774 | rs27565525 | T | T | C | =                                      |  |
| 124.908795 | rs27565524 | T | T | G | =                                      |  |
| 124.919886 | rs6276600  | A | A | A | =                                      |  |
| 124.920531 | rs32170902 | C | C | T | =                                      |  |
| 124.932401 | rs27565410 | C | C | T | =                                      |  |
| 124.99406  | rs27530188 | C | C | G | =                                      |  |
| 125.005507 | rs27530118 | T | T | T | =                                      |  |
| 125.005578 | rs33013895 | C | C | C | =                                      |  |
| 125.013388 | rs32393049 | C | C | C | =                                      |  |
| 125.032155 | rs27529992 | T | T | T | =                                      |  |
| 125.041997 | rs27587895 | C | C | C | =                                      |  |
| 125.046633 | rs3715407  | A | A | G | =                                      |  |
| 125.123455 | rs6180841  | T | T | T | =                                      |  |
| 125.132841 | rs6251391  | G | G | G | =                                      |  |
| 125.137399 | rs27554714 | A | A | A | =                                      |  |
| 125.139487 | rs32178972 | A | A | A | =                                      |  |
| 125.17433  | rs31901521 | T | T | C | Grik3:30676:intron:1:6139:132533       |  |
| 125.174956 | rs32506810 | C | C | T | Grik3:30676:intron:1:6765:132533       |  |

Idd11 as defined by Brodnicki, 2005

|            |            |   |   |   |
|------------|------------|---|---|---|
| 125.193626 | rs27537025 | T | T | C |
| 125.193739 | rs27537024 | T | T | T |
| 125.19917  | rs6159163  | A | A | A |
| 125.199473 | rs6160860  | G | G | G |
| 125.226562 | rs27566555 | G | G | G |
| 125.289479 | rs27551170 | C | C | T |
| 125.301671 | rs27551144 | G | G | G |
| 125.316429 | rs33026455 | A | A | A |
| 125.317022 | rs27551044 | T | T | T |
| 125.323823 | rs27551001 | C | C | G |
| 125.328258 | rs6256474  | G | G | G |
| 125.361544 | rs27530479 | G | G | A |
| 125.390184 | rs27530308 | T | T | T |
| 125.461956 | (liftover) | C | C | C |
| 125.485262 | rs32914111 | A | A | A |
| 125.488431 | rs32381686 | G | G | G |
| 125.488604 | rs31915302 | G | G | G |
| 125.529754 | rs32722472 | C | C | C |
| 125.531285 | rs27551435 | G | G | G |
| 125.531436 | rs27551433 | G | G | G |
| 125.539262 | rs27551396 | C | C | G |
| 125.553542 | rs32489440 | C | C | C |
| 125.558066 | rs27551286 | G | G | G |
| 125.637731 | rs33027037 | T | T | T |
| 125.638134 | rs31799232 | A | A | A |
| 125.642362 | rs6367051  | T | T | G |
| 125.642446 | rs6367586  | G | G | A |
| 125.64911  | rs27566174 | G | G | T |
| 125.675878 | rs27566074 | G | A | G |
| 125.762193 | rs27550222 | C | C | T |
| 125.782416 | rs32714443 | G | G | G |
| 125.79626  | rs27550114 | G | A | G |
| 125.799976 | rs27550099 | T | C | T |
| 125.858137 | rs27528652 | A | A | A |
| 125.86479  | rs3720461  | A | A | G |
| 125.866946 | rs27528639 | A | A | G |
| 125.866971 | rs6268189  | T | T | A |
| 125.877121 | rs31774471 | G | G | G |
| 125.877752 | rs32804090 | A | A | G |
| 125.880438 | rs27528626 | C | C | T |
| 125.881076 | rs32561539 | A | A | A |

Grik3:30676:intron:1:25435:132533  
Grik3:30676:intron:1:25548:132533  
Grik3:30676:intron:1:30979:132533  
Grik3:30676:intron:1:31282:132533  
Grik3:30676:intron:1:58371:132533  
Grik3:30676:intron:1:121288:132533  
Grik3:30676:intron:2:769:8609  
Grik3:30676:intron:3:6659:6754  
Grik3:30676:intron:4:315:2080  
Grik3:30676:intron:5:4981:8080  
Grik3:30676:intron:7:421:5694  
Grik3:30676:intron:10:13543:15235  
=  
=  
=  
=  
=  
=  
=  
=  
=  
=  
=  
=  
=  
=  
=  
=  
=  
=  
1810007P19Rik:106156:intron:8:485:2079  
Stk40:35441:intron:1:1024:19567  
Stk40:35441:intron:1:14868:19567  
Stk40:35441:intron:1:18584:19567  
Thrap3:80919:intron:2:5540:5618  
Thrap3:80919:intron:1:15022:15979  
Thrap3:80919:intron:1:12866:15979  
Thrap3:80919:intron:1:12841:15979  
Thrap3:80919:intron:1:2691:15979  
Thrap3:80919:intron:1:2060:15979  
=  
=

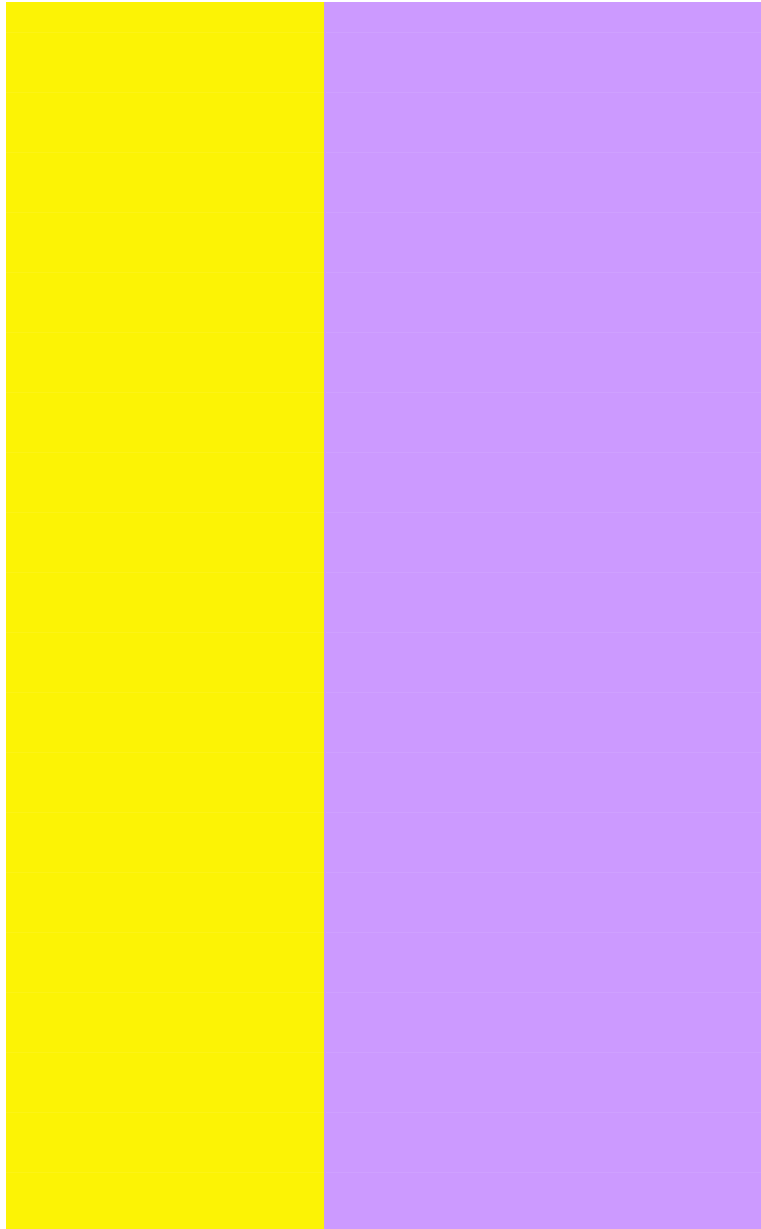

|            |            |   |   |   |
|------------|------------|---|---|---|
| 125.927679 | rs6211332  | T | T | A |
| 125.932294 | rs32984816 | A | A | G |
| 125.944354 | rs27528517 | C | C | C |
| 125.945109 | rs32582148 | A | A | A |
| 125.950425 | rs32834219 | C | C | C |
| 125.950502 | rs6407768  | T | T | T |
| 125.950522 | rs6407804  | C | C | C |
| 125.991071 | rs4224765  | A | G | G |
| 126.020905 | rs27564114 | G | G | G |
| 126.021489 | rs6399039  | A | G | G |
| 126.031894 | rs27564096 | C | T | C |
| 126.060638 | rs27564041 | C | C | C |
| 126.123743 | rs27548175 | G | A | G |
| 126.124234 | rs32761879 | C | T | C |
| 126.132398 | rs27548129 | G | A | A |
| 126.132445 | rs27548128 | G | G | G |
| 126.15009  | rs3666537  | A | A | A |
| 126.184048 | rs27547982 | G | A | A |
| 126.187973 | rs27523061 | G | A | G |
| 126.245361 | rs27522897 | T | T | T |
| 126.248184 | rs32921003 | C | C | C |
| 126.291323 | rs27579527 | G | G | G |
| 126.307352 | rs6168872  | G | A | A |
| 126.336695 | rs31836315 | G | G | G |
| 126.33694  | rs27564709 | A | G | G |
| 126.346841 | rs31796444 | G | A | G |
| 126.379005 | rs32324099 | C | T | C |
| 126.38935  | rs13477965 | G | G | A |
| 126.394525 | rs3692521  | G | A | G |
| 126.511318 | rs6272864  | G | T | T |
| 126.51151  | rs6286262  | T | G | G |
| 126.511791 | rs6287843  | C | T | T |
| 126.514067 | rs6221068  | G | A | G |
| 126.58804  | rs6250665  | A | G | G |
| 126.681651 | rs6360798  | G | A | A |
| 126.685625 | rs6171443  | G | A | G |
| 126.730353 | rs32234036 | A | A | A |
| 126.784546 | rs32650709 | G | A | G |
| 126.785943 | rs6377633  | T | G | G |
| 126.785992 | rs27565946 | G | G | A |
| 126.786031 | rs32826851 | A | A | C |

Mtap7d1:61143:intron:1:5580:13648  
Mtap7d1:61143:intron:1:965:13648  
Trappc3:30660:intron:1:4571:10138  
Trappc3:30660:intron:1:5326:10138  
Trappc3:30660:intron:3:106:813  
Trappc3:30660:intron:3:183:813  
Trappc3:30660:intron:3:203:813  
=  
=  
=  
Eif2c3:69097:intron:13:355:1232  
Eif2c3:69097:intron:5:19769:26122  
Eif2c1:97888:intron:12:2266:5524  
Eif2c1:97888:intron:12:1776:5524  
Eif2c1:97888:intron:8:3954:4683  
Eif2c1:97888:intron:8:3907:4683  
=  
Eif2c2:84285:exon:18:73:133  
Eif2c2:84285:intron:14:688:1181  
Clspn:48391:intron:8:1535:5696  
Clspn:48391:intron:8:4358:5696  
=  
=  
=  
=  
Psmb2:30642:intron:3:14661:18957  
=  
Tcfap2e:48194:intron:6:2129:2614  
AU040320:102607:intron:9:1850:3247  
AU040320:102607:intron:9:2043:3247  
AU040320:102607:intron:9:2324:3247  
AU040320:102607:intron:11:63:527  
Zmym4:106108:exon:9:206:211  
=  
=  
Zmym1:106099:intron:4:1097:2780  
Zmym6:46751:intron:11:578:1823  
Zmym6:46751:exon:12:151:167  
Zmym6:46751:intron:12:31:1207  
Zmym6:46751:intron:12:70:1207

|            |            |   |   |   |                                  |
|------------|------------|---|---|---|----------------------------------|
| 127.045833 | (liftover) | C | C | C | =                                |
| 127.045902 | rs27578319 | C | C | A | =                                |
| 127.050028 | rs27578301 | C | C | T | =                                |
| 127.054398 | rs3704331  | A | A | G | =                                |
| 127.061527 | rs27563851 | G | A | G | =                                |
| 127.06846  | rs27563824 | G | A | A | =                                |
| 127.072972 | rs27563806 | G | A | A | =                                |
| 127.074545 | rs13477968 | G | A | A | =                                |
| 127.106078 | rs27547962 | T | C | T | =                                |
| 127.114876 | rs6221897  | C | C | C | =                                |
| 127.120206 | rs32507597 | G | A | A | =                                |
| 127.125188 | rs32273307 | T | G | G | =                                |
| 127.172004 | rs6302571  | G | G | G | =                                |
| 127.175747 | rs6372177  | G | G | G | =                                |
| 127.375661 | rs6329688  | C | C | C | =                                |
| 127.44453  | rs6275002  | G | G | G | =                                |
| 127.677707 | rs27524020 | A | G | G | Csmd2:97884:intron:1:12190:70689 |
| 127.685735 | rs3717809  | G | A | A | Csmd2:97884:intron:1:20218:70689 |
| 127.686526 | rs28309408 | T | G | T | Csmd2:97884:intron:1:21010:70689 |
| 127.696743 | rs28289539 | C | A | A | Csmd2:97884:intron:1:31227:70689 |
| 127.697254 | rs31985979 | T | C | C | Csmd2:97884:intron:1:31737:70689 |
| 127.709312 | rs28289481 | A | G | G | Csmd2:97884:intron:1:43795:70689 |
| 127.719413 | rs28289453 | A | G | G | Csmd2:97884:intron:1:53896:70689 |
| 127.755328 | rs32654434 | C | T | C | Csmd2:97884:intron:2:18904:54470 |
| 127.760066 | rs28274538 | C | C | C | Csmd2:97884:intron:2:23642:54470 |
| 127.761405 | rs32059643 | G | G | G | Csmd2:97884:intron:2:24981:54470 |
| 127.764706 | rs28274490 | G | A | G | Csmd2:97884:intron:2:28282:54470 |
| 127.773976 | rs28274420 | A | A | A | Csmd2:97884:intron:2:37553:54470 |
| 127.777181 | rs28274403 | C | C | C | Csmd2:97884:intron:2:40758:54470 |
| 127.777334 | rs28274401 | G | G | G | Csmd2:97884:intron:2:40911:54470 |
| 127.784008 | rs31801882 | C | G | G | Csmd2:97884:intron:2:47584:54470 |
| 127.79316  | rs32357801 | T | C | C | Csmd2:97884:intron:3:2152:83437  |
| 127.793617 | rs6360227  | A | A | A | Csmd2:97884:intron:3:2609:83437  |
| 127.79999  | rs6209106  | A | A | A | Csmd2:97884:intron:3:8982:83437  |
| 127.800027 | rs6209177  | C | C | C | Csmd2:97884:intron:3:9019:83437  |
| 127.808404 | rs28258936 | A | A | G | Csmd2:97884:intron:3:17396:83437 |
| 127.810066 | rs3721916  | A | A | A | Csmd2:97884:intron:3:19057:83437 |
| 127.819923 | rs28258875 | C | C | T | Csmd2:97884:intron:3:28914:83437 |
| 127.828986 | rs28258811 | T | T | C | Csmd2:97884:intron:3:37978:83437 |
| 127.829025 | rs28258810 | C | C | G | Csmd2:97884:intron:3:38016:83437 |
| 127.834548 | rs28258766 | C | C | C | Csmd2:97884:intron:3:43539:83437 |

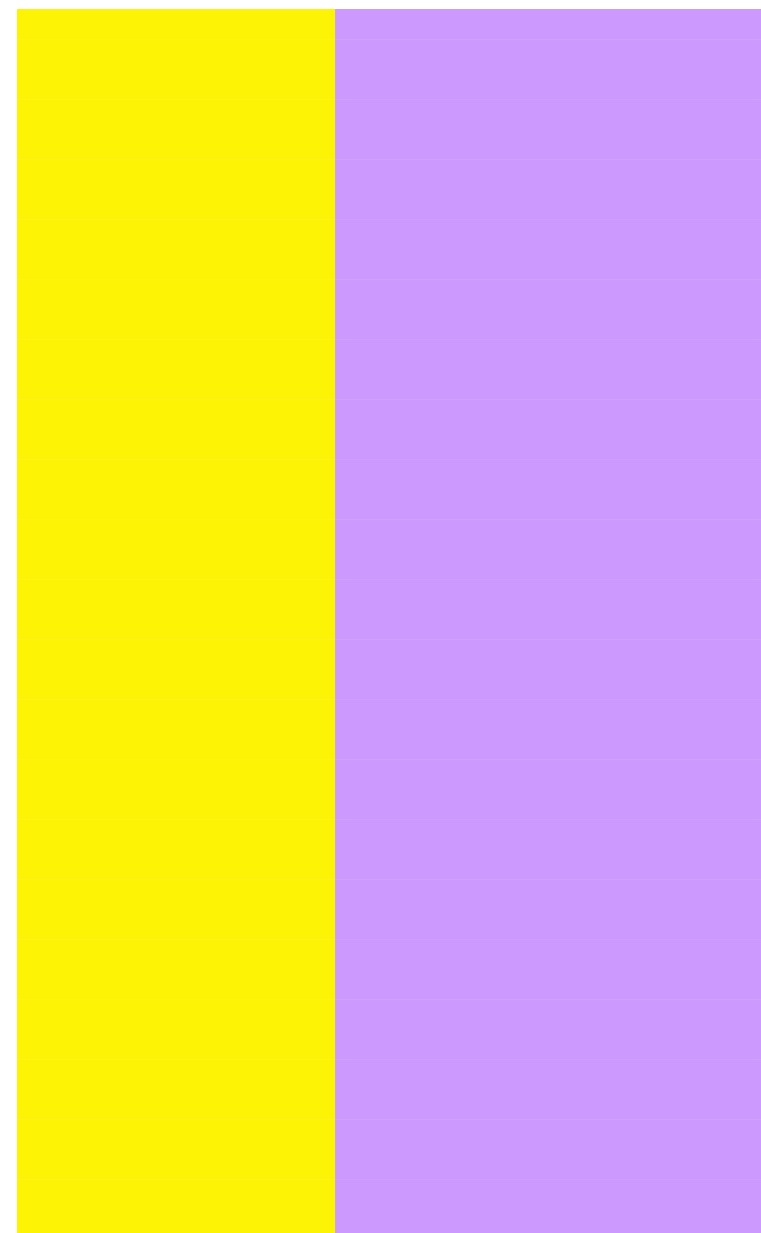



|            |            |   |   |   |                                   |
|------------|------------|---|---|---|-----------------------------------|
| 127.847945 | rs28258688 | G | A | G | Csmd2:97884:intron:3:56937:83437  |
| 127.854852 | rs27549832 | C | T | T | Csmd2:97884:intron:3:63844:83437  |
| 127.856879 | rs3679250  | C | T | T | Csmd2:97884:intron:3:65870:83437  |
| 127.861913 | rs32639402 | C | T | T | Csmd2:97884:intron:3:70904:83437  |
| 127.86385  | rs27549778 | T | G | G | Csmd2:97884:intron:3:72841:83437  |
| 127.866039 | rs27529667 | G | A | A | Csmd2:97884:intron:3:75030:83437  |
| 127.879441 | rs27529590 | G | A | A | Csmd2:97884:intron:4:4799:12318   |
| 127.930399 | rs13477972 | G | G | G | =                                 |
| 127.942426 | rs27511536 | A | G | G | =                                 |
| 127.944322 | rs27511523 | C | C | T | =                                 |
| 127.949624 | rs32776938 | C | C | C | =                                 |
| 127.954923 | rs27511427 | A | G | A | Csmd2:97884:intron:6:13699:14114  |
| 127.955933 | rs31999695 | G | G | G | Csmd2:97884:intron:6:12689:14114  |
| 127.967934 | rs27496060 | G | C | G | Csmd2:97884:intron:6:688:14114    |
| 127.969251 | rs27496056 | T | T | T | Csmd2:97884:intron:7:4386:4937    |
| 127.983903 | rs6403395  | A | G | G | Csmd2:97884:intron:10:14588:14762 |
| 127.989337 | rs32877938 | C | T | T | Csmd2:97884:intron:10:9154:14762  |
| 128.022355 | rs6158785  | A | G | G | Csmd2:97884:intron:13:23771:30184 |
| 128.068952 | rs27558837 | A | A | G | Csmd2:97884:intron:19:1780:9186   |
| 128.074187 | rs6167734  | G | T | G | Csmd2:97884:intron:21:3356:5208   |
| 128.075546 | rs27558769 | T | C | T | Csmd2:97884:intron:21:1997:5208   |
| 128.163837 | rs27575576 | C | A | C | Csmd2:97884:intron:40:207:3322    |
| 128.170442 | rs6372079  | C | C | C | Csmd2:97884:intron:41:73:6260     |
| 128.170634 | rs6373084  | C | C | C | Csmd2:97884:exon:42:70:187        |
| 128.171377 | rs27561120 | G | A | G | Csmd2:97884:intron:42:1887:2558   |
| 128.172972 | rs32811479 | C | T | C | Csmd2:97884:intron:42:291:2558    |
| 128.176603 | rs27561093 | A | A | A | Csmd2:97884:intron:44:9200:11211  |
| 128.17715  | rs27561089 | G | G | G | Csmd2:97884:intron:44:8652:11211  |
| 128.177233 | rs27561088 | C | C | C | Csmd2:97884:intron:44:8569:11211  |
| 128.193761 | rs31830531 | A | A | C | Csmd2:97884:intron:48:1074:4065   |
| 128.194527 | rs6228055  | A | A | A | Csmd2:97884:intron:48:309:4065    |
| 128.196688 | rs3706755  | C | T | C | Csmd2:97884:intron:50:700:950     |
| 128.222228 | rs27546374 | G | G | A | Csmd2:97884:intron:56:987:1124    |
| 128.222777 | rs27546367 | C | C | C | Csmd2:97884:intron:56:438:1124    |
| 128.227771 | rs32749976 | G | G | G | Csmd2:97884:intron:60:1430:2680   |
| 128.236253 | rs27546257 | G | G | G | Csmd2:97884:intron:64:850:2072    |
| 128.269624 | rs27520921 | G | G | A | Zscan20:97877:exon:3:126:171      |
| 128.276718 | rs6287401  | C | C | C | Zscan20:97877:intron:2:4729:11696 |
| 128.313517 | rs32019531 | C | C | C | =                                 |
| 128.318556 | rs32182628 | C | T | C | =                                 |
| 128.390152 | rs27558327 | C | T | C | Phc2:106080:intron:7:547:10548    |

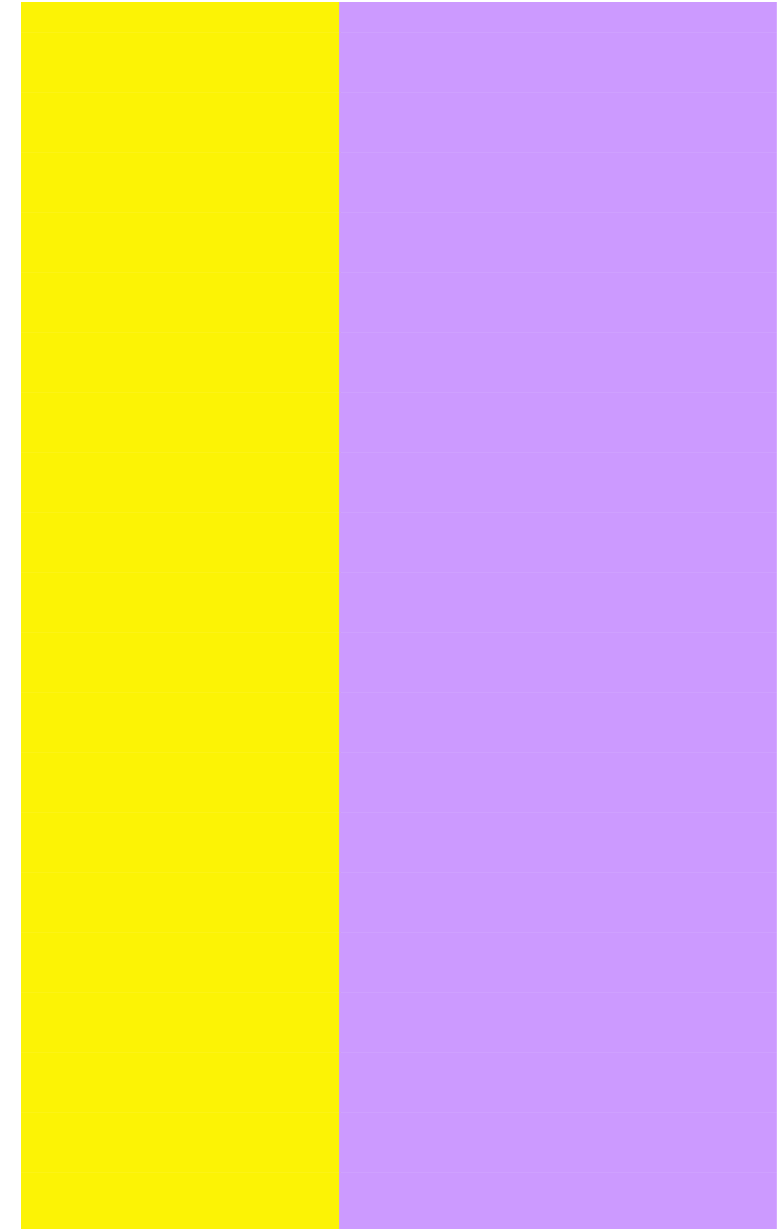

|            |            |   |   |   |
|------------|------------|---|---|---|
| 128.394079 | rs27558320 | T | C | T |
| 128.397635 | rs27558285 | A | A | G |
| 128.402636 | rs27558264 | C | C | C |
| 128.402676 | rs27558262 | G | G | G |
| 128.407585 | rs32409538 | A | A | A |
| 128.421457 | rs27558242 | G | A | G |
| 128.424509 | rs27558231 | C | C | T |
| 128.425092 | rs6246370  | A | G | G |
| 128.428082 | rs13477973 | C | C | C |
| 128.429733 | rs4224774  | G | A | G |
| 128.522938 | rs32692891 | T | T | C |
| 128.547955 | rs6361251  | G | T | T |
| 128.547972 | rs6361293  | T | C | C |
| 128.553104 | rs27518767 | T | A | A |
| 128.554532 | rs3682599  | C | T | T |
| 128.568804 | rs31808858 | C | T | T |
| 128.568931 | rs6212998  | T | G | G |
| 128.656875 | rs32982673 | C | C | T |
| 128.659383 | rs6334688  | T | C | C |
| 128.659441 | rs6335152  | A | G | A |
| 128.659475 | rs6335194  | C | T | C |
| 128.700493 | rs32533122 | C | C | T |
| 128.721432 | rs27507875 | C | C | C |
| 128.771644 | rs27493557 | G | A | A |
| 128.772381 | rs27493539 | G | G | G |
| 128.796566 | rs32515127 | C | T | C |
| 128.800227 | rs32704556 | C | C | C |
| 128.863204 | rs32530883 | G | G | G |
| 128.972916 | rs32637839 | C | C | C |
| 129.003217 | rs27516779 | C | C | T |
| 129.067497 | rs27503097 | C | C | C |
| 129.104808 | rs27486671 | G | G | G |
| 129.125982 | rs31775195 | G | A | G |
| 129.132152 | rs27486540 | C | C | A |
| 129.172812 | rs27519163 | G | G | G |
| 129.202096 | rs31878418 | A | A | G |
| 129.202456 | rs27519079 | C | C | T |
| 129.202535 | rs32047403 | G | G | A |
| 129.229073 | rs3023007  | C | C | A |
| 129.266384 | rs6230055  | A | A | T |
| 129.271313 | rs27503543 | G | G | A |

Phc2:106080:intron:7:4474:10548  
Phc2:106080:intron:7:8031:10548  
Phc2:106080:intron:9:1677:19639  
Phc2:106080:intron:9:1717:19639  
Phc2:106080:intron:9:6626:19639  
Phc2:106080:intron:10:656:1443  
Phc2:106080:intron:13:22:763  
Phc2:106080:intron:13:605:763  
Phc2:106080:intron:14:2553:3214  
Phc2:106080:exonUTR:15:989:1381  
=  
=  
=  
=  
=  
Trim62:35667:intron:1:6981:12241  
Trim62:35667:intron:1:7109:12241  
=  
=  
=  
=  
=  
Hpc2:30572:intron:1:1898:2457  
=  
=  
Sync:102599:intron:2:1295:11964  
Rbbp4:102598:intron:3:2613:5717  
=  
Zbtb8:53042:exonUTR:4:262:2061  
=  
=  
=  
Hdac1:102597:intron:3:4074:4605  
Hdac1:102597:intron:3:3714:4605  
Hdac1:102597:intron:3:3635:4605  
Lck:102596:exon:11:40:152  
=  
Eif3i:102593:intron:6:989:1420

|            |            |   |   |   |                                         |
|------------|------------|---|---|---|-----------------------------------------|
| 129.285462 | rs27503496 | A | A | G | 2510006D16Rik:102591:exonUTR:5:761:1064 |
| 129.288868 | rs27503473 | A | A | G | =                                       |
| 129.30694  | rs3708285  | G | G | A | Txlna:46425:intron:9:614:664            |
| 129.309744 | rs27503370 | C | C | A | Txlna:46425:intron:5:1873:2088          |
| 129.310847 | rs6324687  | A | A | T | Txlna:46425:intron:5:770:2088           |
| 129.316836 | rs32548878 | G | G | A | Txlna:46425:intron:2:662:686            |
| 129.332117 | rs27503309 | G | G | A | Kpna6:102590:exon:7:79:87               |
| 129.390507 | rs6355333  | A | A | C | =                                       |
| 129.390619 | rs6355837  | A | A | C | =                                       |
| 129.394818 | rs3707129  | C | C | A | Khdrbs1:66257:intron:8:1508:2894        |
| 129.396105 | (liftover) | A | A | G | Khdrbs1:66257:intron:8:221:2894         |
| 129.405334 | rs32527750 | G | G | T | Khdrbs1:66257:intron:2:2110:2527        |
| 129.460064 | rs31761641 | C | C | C | =                                       |
| 129.468467 | rs32804587 | G | G | G | =                                       |
| 129.469135 | rs27548339 | G | G | G | =                                       |
| 129.512388 | rs27523625 | T | T | T | Ptp4a2:30578:intron:1:14541:18374       |
| 129.581443 | rs32669349 | G | G | G | =                                       |
| 129.590127 | rs27523430 | T | T | A | =                                       |
| 129.590174 | rs32770951 | C | C | T | =                                       |
| 129.607486 | rs27507150 | T | T | C | =                                       |
| 129.60784  | rs3661158  | A | A | T | =                                       |
| 129.613379 | rs32538263 | T | T | A | =                                       |
| 129.670962 | rs27506973 | G | G | C | Bai2:106015:intron:2:837:12143          |
| 129.688714 | rs27506940 | G | G | A | Bai2:106015:intron:14:50:181            |
| 129.693236 | rs31927373 | A | A | G | Bai2:106015:intron:23:957:2026          |
| 129.698537 | rs27506913 | A | A | G | Bai2:106015:intron:28:38:307            |
| 129.702068 | rs27506888 | G | G | A | =                                       |
| 129.70235  | rs27506885 | T | T | C | =                                       |
| 129.707182 | rs31981414 | T | T | G | =                                       |
| 129.718638 | rs31814358 | G | G | A | =                                       |
| 129.738652 | rs27492032 | A | A | G | Col16a1:44565:intron:24:27:219          |
| 129.772456 | rs27491876 | C | C | C | Col16a1:44565:intron:64:661:992         |
| 129.775759 | rs3698956  | A | G | G | Col16a1:44565:intron:69:270:645         |
| 129.783107 | rs32296086 | T | C | C | =                                       |
| 129.787424 | rs27517916 | T | T | T | Pef1:30563:intron:1:2529:13515          |
| 129.802584 | rs27517816 | C | C | C | Pef1:30563:intron:3:121:433             |
| 129.804978 | rs13460366 | A | A | A | Pef1:30563:exonUTR:5:481:880            |
| 129.807689 | rs6172432  | G | G | G | Hcrtr1:30562:exonUTR:9:559:785          |
| 129.807827 | rs6173076  | C | C | C | Hcrtr1:30562:exonUTR:9:421:785          |
| 129.808881 | rs27517790 | C | T | T | Hcrtr1:30562:intron:8:995:1627          |
| 129.845028 | rs8274322  | G | A | A | Tinagl:30560:exon:7:63:149              |

|            |            |   |   |   |
|------------|------------|---|---|---|
| 129.847468 | rs8272673  | G | A | A |
| 129.859302 | rs27502913 | C | T | T |
| 129.945644 | rs27502722 | C | C | C |
| 129.972687 | rs27487038 | A | T | T |
| 130.004434 | rs13477979 | A | A | A |
| 130.005347 | rs27486878 | G | G | G |
| 130.010338 | rs27486859 | C | C | C |
| 130.01037  | rs27486858 | G | G | G |
| 130.01566  | rs27486828 | T | T | T |
| 130.192876 | rs6370137  | T | T | T |
| 130.261463 | rs6280547  | C | C | C |
| 130.472961 | rs27571971 | C | T | T |
| 130.490753 | rs3024208  | T | C | C |
| 130.493276 | rs31794254 | C | G | G |
| 130.499871 | rs27557403 | A | C | C |
| 130.49989  | rs27557402 | T | C | C |
| 130.59766  | rs32994199 | A | A | A |
| 130.723187 | rs28260697 | G | G | G |
| 130.723455 | rs28260694 | C | C | C |
| 130.724603 | rs28260692 | C | C | C |
| 130.745254 | rs28260589 | G | A | A |
| 130.757629 | rs6155696  | C | T | T |
| 130.761438 | (liftover) | G | G | G |
| 130.762014 | rs28260490 | G | A | A |
| 130.839215 | rs27556051 | A | A | A |
| 130.841042 | rs13477982 | G | G | G |
| 130.882555 | rs27555797 | C | C | C |
| 131.042318 | rs6175993  | C | T | T |
| 131.04243  | rs6176542  | G | A | A |
| 131.083535 | rs13477983 | C | C | C |
| 131.111806 | rs27539160 | G | G | G |
| 131.11189  | rs27539159 | G | G | G |
| 131.1144   | rs32545155 | C | C | C |
| 131.179134 | rs13477984 | A | G | G |
| 131.222    | rs6206222  | A | A | A |
| 131.239754 | rs6309309  | C | C | C |
| 131.327707 | rs13477985 | G | G | G |
| 131.335045 | rs27554287 | C | C | C |
| 131.385133 | rs3089399  | A | A | A |
| 131.405132 | rs32654442 | C | C | C |
| 131.405806 | rs27537776 | A | A | A |

Tinagl:30560:intron:3:2706:3526  
=  
Serinc2:75677:intron:1:7056:10226  
=  
Zcchc17:105995:intron:7:1:10382  
Zcchc17:105995:intron:6:1470:2234  
Zcchc17:105995:intron:5:3982:7401  
Zcchc17:105995:intron:5:3950:7401  
Zcchc17:105995:intron:4:66:1312  
=  
Pum1:30315:intron:3:4436:17041  
Laptm5:30316:intron:1:3611:12668  
Laptm5:30316:exonUTR:8:377:1680  
=  
=  
=  
=  
=  
=  
=  
=  
=  
=  
=  
=  
=  
=  
=  
=  
=  
=  
=  
=  
=  
Ptpru:105987:intron:27:710:930  
Ptpru:105987:exon:23:47:154  
Ptpru:105987:intron:1:8864:14118  
Mecr:105983:intron:1:5537:8643  
Mecr:105983:intron:1:6211:8643

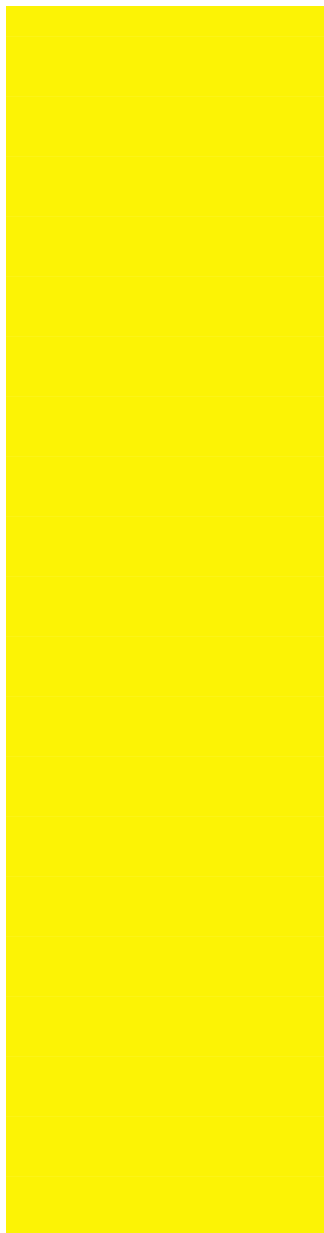

|            |            |   |   |   |                                     |
|------------|------------|---|---|---|-------------------------------------|
| 131.411924 | rs27589731 | C | C | C | Mecr:105983:intron:4:1291:3039      |
| 131.462113 | rs27571329 | A | A | A | =                                   |
| 131.46318  | rs6271927  | T | T | T | =                                   |
| 131.463461 | rs27571326 | C | C | C | =                                   |
| 131.463564 | rs6274131  | C | C | C | =                                   |
| 131.473401 | rs32925582 | A | A | A | =                                   |
| 131.479415 | rs32677228 | C | C | C | Epb4.1:105975:UTR:21:2433:2520      |
| 131.481438 | rs32595861 | A | A | A | Epb4.1:105975:UTR:21:410:2520       |
| 131.493922 | rs32921209 | G | G | G | Epb4.1:105975:intron:12:24916:27054 |
| 131.494478 | rs4137024  | C | C | C | Epb4.1:105975:intron:12:24360:27054 |
| 131.499288 | rs32773275 | A | A | A | Epb4.1:105975:intron:12:19549:27054 |
| 131.49939  | rs27571156 | G | G | G | Epb4.1:105975:intron:12:19448:27054 |
| 131.507348 | rs27571105 | C | C | C | Epb4.1:105975:intron:12:11489:27054 |
| 131.525927 | rs6205997  | A | A | A | Epb4.1:105975:intron:6:12440:14476  |
| 131.52956  | rs31884959 | G | G | G | Epb4.1:105975:intron:6:8807:14476   |
| 131.555832 | rs32745078 | T | T | T | Epb4.1:105975:intron:3:281:2656     |
| 131.565378 | rs6216050  | T | T | T | =                                   |
| 131.565876 | rs6218778  | C | C | C | =                                   |
| 131.566136 | rs6232772  | G | G | G | =                                   |
| 131.572784 | rs27538944 | A | A | A | =                                   |
| 131.598948 | rs33028144 | A | A | A | =                                   |
| 131.622455 | rs32357090 | A | A | A | =                                   |
| 131.649006 | rs27538669 | G | G | G | =                                   |
| 131.661473 | rs27571949 | T | T | T | =                                   |
| 131.671161 | rs27571891 | G | G | G | Oprd1:56336:intron:2:1871:3048      |
| 131.673979 | rs27571879 | A | A | A | Oprd1:56336:intron:1:26093:26689    |
| 131.679453 | rs27571844 | A | A | A | Oprd1:56336:intron:1:20620:26689    |
| 131.693048 | rs3665429  | G | A | A | Oprd1:56336:intron:1:7024:26689     |
| 131.714795 | rs32085537 | C | C | C | =                                   |
| 131.73717  | rs27571729 | C | T | T | =                                   |
| 132.269704 | rs27574544 | A | A | T | Eya3:105927:intron:16:1825:7246     |
| 132.274214 | rs31877044 | C | C | G | Eya3:105927:intron:16:6335:7246     |
| 132.291007 | rs32040669 | A | A | A | Smpd13b:30709:intron:7:2926:4257    |
| 132.328214 | rs27559328 | A | A | A | Rpa2:102561:intron:4:344:1870       |
| 132.380276 | rs27559177 | A | A | G | =                                   |
| 132.384225 | rs27559165 | G | G | A | Ppp1r8:30702:intron:6:1062:1164     |
| 132.384394 | rs27559164 | A | A | G | Ppp1r8:30702:intron:6:893:1164      |
| 132.38444  | rs6304995  | A | A | A | Ppp1r8:30702:intron:6:847:1164      |
| 132.402407 | rs31797596 | A | A | G | =                                   |
| 132.410011 | rs3664871  | G | G | A | Stx12:30698:exonUTR:9:1462:2054     |
| 132.419164 | rs13459077 | C | C | T | Stx12:30698:exon:4:47:136           |

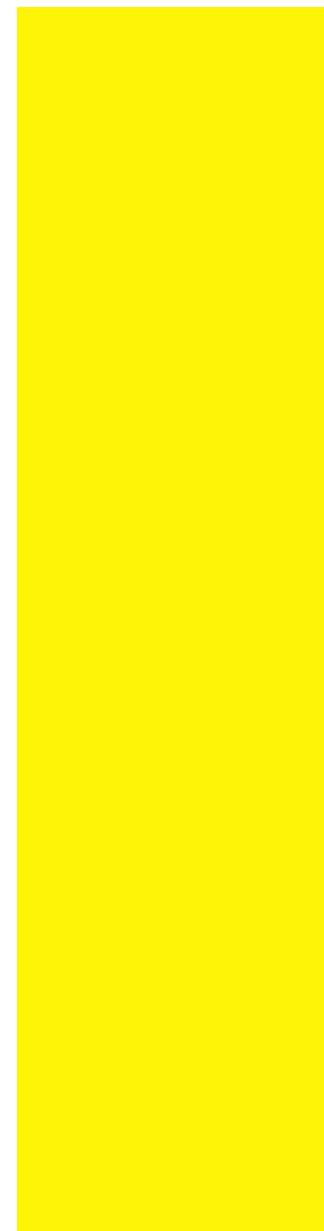

|            |            |   |   |   |
|------------|------------|---|---|---|
| 132.423448 | rs32584597 | T | T | C |
| 132.431032 | rs27543107 | T | T | C |
| 132.445988 | rs6235031  | G | G | A |
| 132.450471 | rs32546992 | A | A | G |
| 132.469336 | rs27542958 | C | C | T |
| 132.469363 | rs27542957 | G | G | A |
| 132.473951 | rs32352017 | T | T | C |
| 132.483647 | rs3721169  | C | C | A |
| 132.487626 | rs31740095 | A | A | G |
| 132.494106 | rs27542907 | A | A | T |
| 132.495658 | rs32830723 | G | G | T |
| 132.506831 | rs27590336 | C | A | C |
| 132.55615  | rs4224808  | G | C | G |
| 132.607474 | rs32553538 | G | G | G |
| 132.607593 | rs27572270 | T | T | T |
| 132.609587 | rs31835031 | C | C | C |
| 132.631622 | rs27557160 | G | G | G |
| 132.642384 | rs33024223 | G | A | G |
| 132.643328 | rs32345660 | G | G | G |
| 132.648947 | rs27557134 | T | T | T |
| 132.661554 | (liftover) | C | A | C |
| 132.661866 | rs6168969  | T | T | G |
| 132.661901 | rs6169419  | C | C | T |
| 132.683807 | rs27557088 | C | T | C |
| 132.687512 | rs27557066 | T | A | T |
| 132.691183 | rs3687815  | G | C | G |
| 132.691429 | rs3689125  | C | G | C |
| 132.74491  | rs27541519 | C | C | T |
| 132.781433 | rs27541374 | C | T | C |
| 132.781978 | rs27541373 | G | A | G |
| 132.782128 | rs27541372 | T | G | T |
| 132.807709 | rs32140167 | C | C | T |
| 132.807931 | rs27573447 | G | A | G |
| 132.808377 | rs27573445 | G | C | G |
| 132.810523 | rs32051931 | A | T | A |
| 132.821069 | rs27573361 | G | A | A |
| 132.822241 | rs13477988 | G | G | A |
| 132.826316 | rs32348726 | A | G | G |
| 132.8265   | rs27573334 | C | G | C |
| 132.837224 | rs6297037  | C | G | C |
| 132.854278 | rs27558164 | T | C | T |

Stx12:30698:intron:3:634:4870  
Stx12:30698:intron:1:9129:12588  
=  
=  
BC008163:30696:intron:5:246:2889  
BC008163:30696:intron:5:219:2889  
BC008163:30696:intron:2:2690:2949  
=  
=  
=  
=  
Fgr:30693:exonUTR:13:100:2578  
Ahdc1:105915:intron:2:39271:42723  
Ahdc1:105915:intron:2:39389:42723  
Ahdc1:105915:intron:2:41384:42723  
Ahdc1:105915:intron:5:9428:10707  
=  
=  
=  
=  
Wasf2:84241:intron:1:868:45710  
Wasf2:84241:intron:1:4538:45710  
Wasf2:84241:intron:1:4785:45710  
Wasf2:84241:intron:4:3242:3324  
=  
=  
=  
Map3k6:30677:intron:25:19:84  
Map3k6:30677:intron:26:44:82  
Map3k6:30677:exon:28:62:75  
Sytl1:30674:intron:13:923:1871  
=  
D4Ert196e:74705:exonUTR:8:595:874  
D4Ert196e:74705:intron:4:561:1152  
D4Ert196e:74705:intron:4:377:1152  
=  
Wdtdc1:43305:intron:12:2196:2903

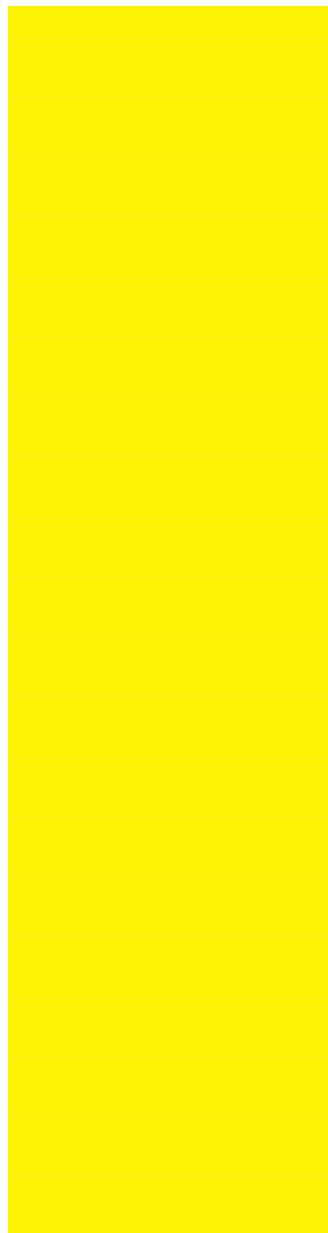

|            |            |   |   |   |
|------------|------------|---|---|---|
| 132.858678 | rs3714017  | C | A | C |
| 132.85871  | rs3714069  | T | A | T |
| 132.859071 | rs3716533  | T | T | A |
| 132.875984 | rs3713447  | A | T | A |
| 132.889823 | rs3679719  | A | G | A |
| 132.900671 | rs3702908  | A | G | A |
| 132.90511  | rs32814252 | C | T | C |
| 132.934772 | rs27557901 | G | G | G |
| 132.945086 | rs27557868 | A | A | A |
| 132.95035  | rs27541348 | C | C | C |
| 132.961832 | rs27541323 | C | C | C |
| 132.962895 | rs27541322 | T | C | T |
| 132.966288 | rs27541308 | A | G | A |
| 132.9991   | rs27541188 | A | G | A |
| 133.020919 | rs3666203  | G | C | G |
| 133.022792 | rs3705810  | A | T | A |
| 133.059312 | rs27575563 | G | A | G |
| 133.062857 | rs27575549 | A | G | A |
| 133.062943 | rs3720944  | G | C | G |
| 133.062964 | rs32278662 | T | C | C |
| 133.102348 | (liftover) | T | T | T |
| 133.120282 | rs13477989 | T | T | T |
| 133.161497 | rs27559955 | G | A | G |
| 133.195245 | rs31926684 | C | T | C |
| 133.205744 | rs3697791  | C | G | C |
| 133.205765 | rs3698233  | A | G | A |
| 133.21924  | rs3653502  | A | G | G |
| 133.226478 | rs32966714 | A | G | A |
| 133.250307 | rs27559690 | C | G | C |
| 133.250858 | rs27559687 | C | T | C |
| 133.255494 | rs27559676 | C | T | C |
| 133.25552  | rs27559675 | A | C | A |
| 133.264317 | rs32206113 | G | G | A |
| 133.268738 | rs3671045  | G | A | G |
| 133.269026 | rs3672821  | A | G | A |
| 133.272035 | rs27542812 | A | G | G |
| 133.297566 | rs31809658 | T | A | A |
| 133.311577 | rs13477990 | A | G | G |
| 133.311651 | rs27556800 | G | G | T |
| 133.376952 | rs31855473 | G | A | G |
| 133.422434 | rs27546469 | C | T | C |

Wdtdc1:43305:intron:9:786:1093  
Wdtdc1:43305:intron:9:754:1093  
Wdtdc1:43305:intron:9:393:1093  
Wdtdc1:43305:intron:3:2101:8363  
Wdtdc1:43305:intron:1:5086:15019  
=  
=  
Slc9a1:84240:intron:1:7948:40928  
Slc9a1:84240:intron:1:18262:40928  
Slc9a1:84240:intron:1:23527:40928  
Slc9a1:84240:intron:1:35009:40928  
Slc9a1:84240:intron:1:36071:40928  
Slc9a1:84240:intron:1:39464:40928  
=  
=  
=  
=  
=  
=  
=  
=  
Pigv:62118:intron:3:1331:1865  
Pigv:62118:intron:1:1755:2456  
Arid1a:105897:intron:7:269:590  
Arid1a:105897:intron:6:627:740  
Arid1a:105897:intron:4:19957:23379  
Arid1a:105897:intron:4:19931:23379  
Arid1a:105897:intron:4:11134:23379  
Arid1a:105897:intron:4:6713:23379  
Arid1a:105897:intron:4:6425:23379  
Arid1a:105897:intron:4:3416:23379  
Arid1a:105897:intron:1:10816:29415  
=  
=  
=  
Rps6ka1:3741:intron:7:602:721

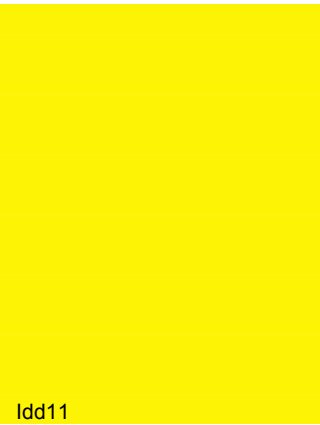

|            |            |   |   |   |
|------------|------------|---|---|---|
| 133.428429 | rs27594521 | C | A | C |
| 133.435086 | rs27594490 | T | C | T |
| 133.435414 | rs13477991 | G | G | A |
| 133.437646 | rs27594479 | T | C | T |
| 133.437778 | rs31787965 | G | A | G |
| 133.440901 | rs3682399  | C | T | C |
| 133.464073 | rs32144747 | C | A | C |
| 133.464482 | rs32191390 | A | T | A |
| 133.481398 | rs32441878 | C | A | C |
| 133.521695 | rs27574257 | C | C | C |
| 133.524345 | rs32109026 | C | T | C |
| 133.533582 | rs32459849 | G | A | G |
| 133.547607 | rs27574190 | G | A | G |
| 133.548471 | rs13469621 | T | C | T |
| 133.557721 | rs27574156 | T | G | T |
| 133.563784 | rs27574134 | A | G | A |
| 133.563864 | rs31849723 | C | T | C |
| 133.573384 | rs32169827 | A | G | A |
| 133.574402 | rs32683895 | C | A | C |
| 133.601214 | rs32340332 | C | T | C |
| 133.601262 | rs32343641 | C | A | C |
| 133.601326 | rs27560257 | C | T | C |
| 133.614339 | rs27560213 | A | G | A |
| 133.620972 | rs27560176 | C | T | C |
| 133.628172 | rs3723862  | A | G | A |
| 133.629716 | rs27560134 | C | T | C |
| 133.630765 | rs13477992 | G | A | G |
| 133.708672 | rs27543965 | T | C | T |
| 133.721841 | rs32634226 | C | A | C |
| 133.735237 | rs32628878 | A | G | A |
| 133.774089 | rs27543820 | G | A | G |
| 133.77471  | rs27543815 | G | A | G |
| 133.800576 | rs32235652 | C | C | C |
| 133.804582 | rs3654182  | C | T | C |
| 133.814251 | rs3659153  | T | C | T |
| 133.828724 | rs32917115 | C | A | C |
| 133.872237 | rs27578112 | G | A | G |
| 133.906844 | rs3682588  | C | C | C |
| 133.913304 | rs3681494  | A | G | A |
| 133.922752 | rs4136309  | A | G | A |
| 133.960384 | rs27563155 | T | G | T |

Rps6ka1:3741:intron:2:8402:8912  
Rps6ka1:3741:intron:2:1744:8912  
Rps6ka1:3741:intron:2:1417:8912  
Rps6ka1:3741:intron:1:5838:6607  
Rps6ka1:3741:intron:1:5705:6607  
Rps6ka1:3741:intron:1:2583:6607  
=  
=  
=  
Hmgn2:102552:intron:6:169:375  
Hmgn2:102552:intron:1:42:562  
Dhdds:105889:intron:8:2456:8869  
Dhdds:105889:intron:5:770:1082  
Dhdds:105889:exon:5:23:116  
=  
=  
Lin28:51674:exon:3:146:184  
Lin28:51674:intron:2:583:9955  
Lin28:51674:intron:1:223:460  
=  
=  
=  
=  
=  
Aim1l:40805:intron:1:3719:3891  
Aim1l:40805:exonUTR:2:1371:2504  
Aim1l:40805:exonUTR:2:2419:2504  
Ccgc21:40271:intron:6:1051:1518  
Ccgc21:40271:intron:3:1361:10915  
Ccgc21:40271:intron:1:7620:14060  
Catsper4:55892:exon:6:87:119  
Catsper4:55892:intron:4:2723:3011  
Zfp593:30644:exonUTR:3:269:1623  
=  
=  
=  
Trim63:30638:intron:1:938:1003  
Slc30a2:105872:intron:5:1538:2559  
Extl1:30643:exonUTR:11:441:1451  
Extl1:30643:intron:1:4119:5968  
Pafah2:39233:intron:3:224:761



|            |            |   |   |   |
|------------|------------|---|---|---|
| 133.976596 | rs27563079 | T | C | T |
| 133.996434 | rs32326264 | C | C | C |
| 133.996504 | rs27563003 | C | G | C |
| 134.014211 | rs27547313 | T | C | T |
| 134.014233 | rs27547312 | A | G | A |
| 134.015651 | rs3680298  | G | A | G |
| 134.0356   | rs27547179 | A | A | C |
| 134.035655 | rs27547178 | C | C | T |
| 134.045156 | rs6294415  | G | G | G |
| 134.047604 | rs13477993 | T | T | C |
| 134.047858 | rs27547127 | A | G | G |
| 134.095142 | rs32373575 | G | A | A |
| 134.124848 | rs32872720 | T | C | C |
| 134.137317 | rs32566356 | G | C | G |
| 134.177826 | rs6221410  | G | G | G |
| 134.190126 | rs6327269  | G | A | A |
| 134.233017 | rs28261585 | G | A | A |
| 134.233132 | rs28261582 | G | T | T |
| 134.238217 | rs32826628 | A | G | G |
| 134.294814 | rs13477994 | G | A | A |
| 134.296205 | rs27591549 | C | T | T |
| 134.298556 | rs27591517 | C | T | T |
| 134.346681 | rs6312341  | G | A | A |
| 134.416255 | rs27558707 | G | G | G |
| 134.418126 | rs27558681 | C | T | T |
| 134.452902 | rs27558492 | C | C | C |
| 134.457611 | rs32565523 | A | A | A |
| 134.475897 | rs27543402 | A | G | G |
| 134.482674 | rs13470100 | A | G | G |
| 134.49363  | rs27543340 | G | A | A |

Pafah2:39233:intron:9:641:2336

=

=

=

=

=

=

=

=

=

=

Sepn1:105865:exonUTR:13:562:1896

Man1c1:38628:exon:10:181:219

Man1c1:38628:intron:6:2897:3410

Man1c1:38628:intron:3:18374:46919

Man1c1:38628:intron:3:6074:46919

Man1c1:38628:intron:2:25842:62559

Man1c1:38628:intron:2:25726:62559

Man1c1:38628:intron:2:20641:62559

=

=

=

=

=

=

=

Tmem50a:30626:intron:5:1952:2887

=

D4Wsu53e:78084:exon:4:23:82

=

SUPPLEMENTARY  
FIGURE 2

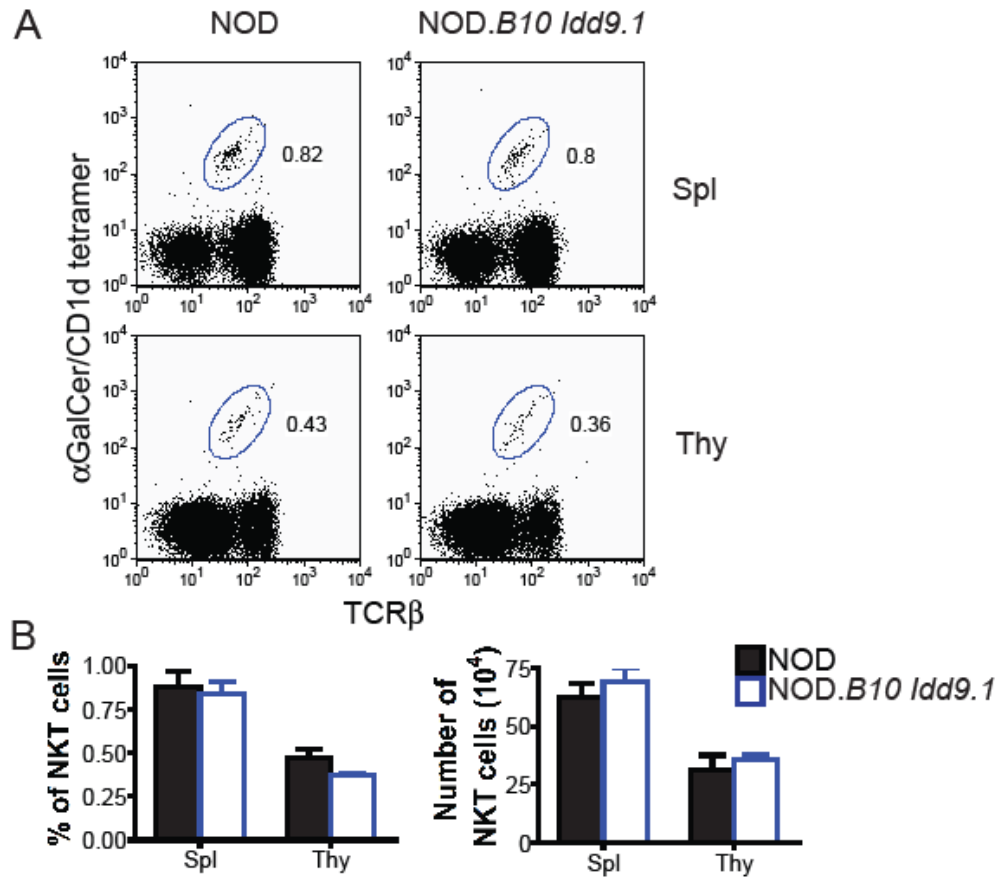

**Supplementary Figure 2.** Normal development of iNKT cells in NOD.B10 *Idd9.1* versus NOD mice. **A**, Representative flow cytometry profiles. **B**, Percentage and absolute numbers of iNKT cells/strain. Spl, Spleen; Thy, Thymus. Data correspond to averages  $\pm$  S.E for 3 mice per group (9-11 wk-old).

SUPPLEMENTARY FIGURE 3

A

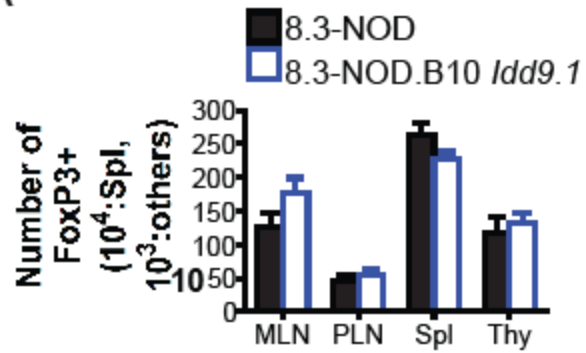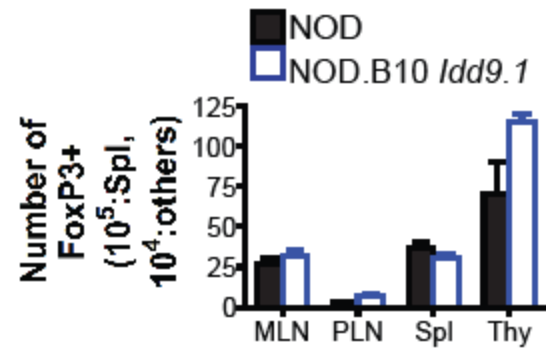

B

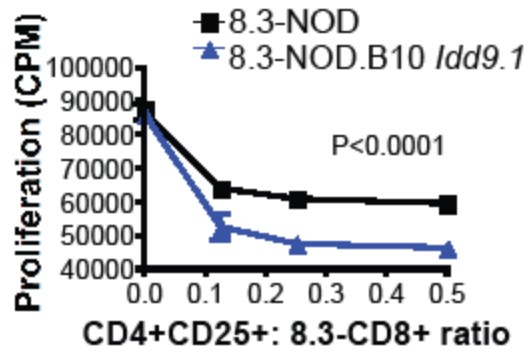

Supplement: supp_db09-0648_db09-0648_Online_Appendix.pdf [file supp_db09-0648_db09-0648_Online_Appendix.pdf]
